# Supplementary material for: Cocultured porcine granulosa cells respond to excess non-esterified fatty acids during in vitro maturation
Source: J Ovarian Res. 2021 Oct 28;14:142. doi: 10.1186/s13048-021-00904-y (PMC8554973; doi:10.1186/s13048-021-00904-y)
Supplement: Supplementary file 1 — Additional file 1. [file 13048_2021_904_MOESM1_ESM.xlsx]

## Sheet: Sheet1
Supplemental Table S1 Affected Go annotations
Category	Term	Count	Genes
Biological Process	GO:0045893~positive regulation of transcription, DNA-templated	16	RNF10, CREBBP, BRPF1, TGFB1, DDX3X, STAT1, RNF14, TESC, PHB, FOXP3, ESR1, ING2, BAMBI, WT1, CD38, ATXN7L3
Biological Process	GO:0008285~negative regulation of cell proliferation	13	CDKN2B, SMAD4, TGFB1, TESC, VEGFC, PHB, SMAD6, FOXP3, KAT2B, ADGRG1, ING2, REST, WT1
Biological Process	GO:0008283~cell proliferation	10	SMAD4, GNG2, PRKDC, CUL1, POLR3G, TACC1, GMNC, MYH10, GLUL, ZFP36L1
Biological Process	GO:0015031~protein transport	9	SEC61A2, ATG3, IST1, KDELR1, DUOXA1, GOSR1, SCAMP3, RAB11A, ARCN1
Biological Process	GO:0008360~regulation of cell shape	9	DMTN, SEMA4D, FES, CSNK1A1, BAMBI, SH3KBP1, ARAP3, FYN, MYH10
Biological Process	GO:0042787~protein ubiquitination involved in ubiquitin-dependent protein catabolic process	9	RNF146, RNF145, RNF14, CUL1, RNF181, NEDD4L, SPOPL, RNF7, RNF185
Biological Process	GO:0030308~negative regulation of cell growth	8	TSPYL2, SMAD4, TGFB1, DDX3X, WT1, PHB, GAS2L1, FBP1
Biological Process	GO:0006468~protein phosphorylation	8	DGUOK, TGFB1, CCNT1, CSNK1A1, WNK1, NEK6, AAK1, HCST
Biological Process	GO:0030317~sperm motility	7	LDHC, INPP5B, CATSPER1, ING2, CATSPER2, SORD, GAS8
Biological Process	GO:0051603~proteolysis involved in cellular protein catabolic process	7	PSMB6, PSMB7, PSMA1, FAP, CTSK, CTSZ, CTSH
Biological Process	GO:0045454~cell redox homeostasis	7	PRDX3, PRDX2, ERP44, TMX2, NNT, GLRX5, TXNDC8
Biological Process	GO:0006919~activation of cysteine-type endopeptidase activity involved in apoptotic process	6	ACER2, MTCH1, HIP1, STAT1, CTSH, S100A8
Biological Process	GO:1903955~positive regulation of protein targeting to mitochondrion	6	NPEPPS, PSMB7, HHAT, STARD7, CTSK, WDR75
Biological Process	GO:0031146~SCF-dependent proteasomal ubiquitin-dependent protein catabolic process	5	FBXW5, CUL1, FBXL3, RNF7, FBXO9
Biological Process	GO:0050852~T cell receptor signaling pathway	5	UBE2N, MAPK1, FYN, PLCG1, FOXP3
Biological Process	GO:0006887~exocytosis	5	CCR1, EXOC7, MYH10, LIN7B, RAB11A
Biological Process	GO:0072520~seminiferous tubule development	4	SMAD4, ADGRG1, ING2, TBC1D20
Biological Process	GO:0045773~positive regulation of axon extension	4	MACF1, GOLGA4, SRF, RAB11A
Biological Process	GO:0051881~regulation of mitochondrial membrane potential	4	PRDX3, PANK2, TUSC2, SLC25A33
Biological Process	GO:0042758~long-chain fatty acid catabolic process	3	LIPE, ACADL, ABCD1
Biological Process	GO:0071156~regulation of cell cycle arrest	3	BIN1, FOXM1, SLC25A33
Biological Process	GO:0010763~positive regulation of fibroblast migration	3	TGFB1, DMTN, ITGB3
Biological Process	GO:0048268~clathrin coat assembly	3	HIP1, EPS15, SNAP91
Biological Process	GO:0051382~kinetochore assembly	3	CENPT, CENPA, CENPC
Biological Process	GO:0097345~mitochondrial outer membrane permeabilization	3	BNIP3L, RHOT1, BLOC1S2
Biological Process	GO:0035024~negative regulation of Rho protein signal transduction	3	ITGB1, ARAP3, TNFAIP1
Biological Process	GO:0042407~cristae formation	3	AFG3L2, CHCHD3, OMA1
Biological Process	GO:0072583~clathrin-mediated endocytosis	3	HIP1, FNBP1L, DNM1
Biological Process	GO:0050901~leukocyte tethering or rolling	3	ITGB1, ROCK1, GCNT1
Biological Process	GO:0048545~response to steroid hormone	3	PAQR8, PAQR7
Biological Process	GO:0007062~sister chromatid cohesion	3	STAG2, DDX11, SMC5
Biological Process	GO:0048875~chemical homeostasis within a tissue	2	HOMER1, HOMER2
Biological Process	GO:0090188~negative regulation of pancreatic juice secretion	2	WNK1, NR1H3
Biological Process	GO:0010710~regulation of collagen catabolic process	2	ITGB1, FAP
Biological Process	GO:0006796~phosphate-containing compound metabolic process	2	TGFB1, PPA1
Cellular Component	GO:0005737~cytoplasm	127	CARS, GLTP, SMC4, LIPE, RGS5, SYDE1, NPEPPS, TUBB1, PAPOLA, MAP3K8, KAT7, FBXO9, TSPYL2, FBXW5, FOXP3, RUNX1, KCTD9, MTAP, DDX39A, BIN1, PPA1, PSME1, BCORL1, NEIL1, ZNF395, GGNBP2, CDCA7, NEDD4L, PTTG1IP, LDHC, NEU3, PRDX2, DPP8, AMDHD1, TPR, GAS2L1, MORC2, HEXIM2, SMAD4, CREBBP, TGFB1, AFAP1L1, TRAPPC1, DTNB, SETDB1, UBE2C, HOMER2, NEK6, SMAD6, ELL2, EIF1, IBTK, FUBP3, STK25, WNK1, BAMBI, SP4, U…
Cellular Component	GO:0005634~nucleus	119	GABPB2, CCNT1, LIPE, CHCHD3, MPC2, PAPOLA, MACROD1, EIF2D, KAT7, GLUL, HMGN3, TSPYL2, ZNF18, USP2, KRT1, DNTTIP1, FOXP3, ASRGL1, RUNX1, DPM1, PYGO2, MTAP, CCNY, GMNC, NEIL1, ATF6, S100A8, RHNO1, ZNF395, GGNBP2, PRKDC, TSHZ1, CDCA7, MYNN, CREM, NEDD4L, PTTG1IP, ZFP36L1, LDHC, DGUOK, SAFB2, MYH10, MORC2, ZNF541, HEXIM2, NGFR, TFAP2C, CREBBP, TGFB1, AFAP1L1, SETDB1, UBE2C, ESRRB, SMAD6, ESR1, EIF1, …
Cellular Component	GO:0070062~extracellular exosome	109	ITSN2, CD86, SCARB2, SLC46A3, GLTP, CPNE4, SPPL2A, FNBP1L, NPEPPS, GOLGA4, CHCHD3, TUBB1, LGALS8, GLUL, SLC39A4, DDX11, RPS5, KRT1, JMJD8, SCAMP3, MTAP, CLPS, CCNY, PPA1, PSME1, SUCLG1, KCTD12, S100A8, COPA, GLO1, NEDD4L, PTTG1IP, PHB, KNG1, ACMSD, LDHC, PRDX3, PRDX2, ADGRG1, DPP6, SAFB2, TAC3, ASL, MYH10, NAA50, CFAP70, CNFN, ACADSB, EXT2, GNPTG, CXCL12, STK25, UBE2N, AARS, ITGB1, GPI, AHCTF1, D…
Cellular Component	GO:0005654~nucleoplasm	54	GPI, NXT1, SLC44A1, ECSIT, FOXM1, CHD2, SMC4, GOLGA4, PAPOLA, MRPS26, DUSP3, DDX11, VWA5A, PAX6, HAUS2, RUNX1, HNRNPH3, BCORL1, BDP1, FAN1, NFAT5, PRKDC, CDCA7, RNF7, PHB, FAM129B, PSMB6, PSMB7, WRN, DPP8, POLD1, SAFB2, MAPK1, PMS2, E2F4, RBM39, HEXIM2, CDKN2B, TFAP2C, ZRANB2, SETDB1, USP21, NUDT22, LYRM1, NSFL1C, IBTK, SP1, WT1, EIF3L, FUBP1, SP4, HNRNPA2B1, SNRNP48, FERMT2
Cellular Component	GO:0005739~mitochondrion	48	MTCH1, PANK2, SLC44A1, TUSC2, ETFDH, DLST, PHYHIPL, MTFR1L, DCAF5, ECSIT, HSD17B10, NT5C, PRDX3, LIPE, DGUOK, ACADL, TMEM65, MINOS1, BLOC1S2, NARS2, MACROD1, MYL10, MAPK1, ME2, ABCD1, GLUL, MYH10, MRPS26, TFAP2C, UROS, ACAD9, RSAD1, SORD, QRSL1, ACADSB, COX6B, RAB11A, ACSF2, BCKDK, LYRM1, AMACR, PKM, AGPS, RPUSD3, PEX5, GUF1, L2HGDH, MRRF
Cellular Component	GO:0005829~cytosol	43	PANK2, C2CD2, URM1, GOSR1, NGLY1, WDR45, PPM1F, CNDP1, ACMSD, ZFP36L1, FAM129B, INPP5B, LIPE, DGUOK, CTSH, MAPK1, ASL, HOMER3, PLCG1, LGALS8, EPS15, SNX5, TOP3B, ATG3, DMTN, DUSP3, ANXA2, PGAM2, AP1AR, FOS, MTOR, RNF146, NSFL1C, PEX5, GEMIN5, FBXL3, SUCLG1, DEPDC5, GAPDH, FBP1, PLCD1, ATP6V1B1, AARS
Cellular Component	GO:0005743~mitochondrial inner membrane	15	ETFDH, PHB, DHRS1, ATP5G1, PRODH2, COX6B, NIPSNAP1, AFG3L2, SLC25A15, NNT, MPC2, GUF1, NDUFAF3, SUCLG1, SLC25A14
Cellular Component	GO:0005623~cell	7	PRDX2, ERP44, TMX2, CCKBR, CARTPT, TXNDC8, KNG1
Cellular Component	GO:0015630~microtubule cytoskeleton	7	RUSC1, FES, SP4, PMS2, MAPK1, TACC1, GAPDH
Cellular Component	GO:0019005~SCF ubiquitin ligase complex	6	FBXW5, CUL1, SPOPL, FBXL3, FBXO44, FBXO9
Cellular Component	GO:0000776~kinetochore	5	CENPT, KAT2B, TPR, CENPA, CENPC
Cellular Component	GO:0001726~ruffle	5	ROCK1, TESC, ASAP3, ARAP3, PLCG1
Cellular Component	GO:0042470~melanosome	5	GCHFR, ITGB1, ANXA2, TMEM33, SLC2A1
Cellular Component	GO:0005778~peroxisomal membrane	4	PEX5, AGPS, FAR1, ABCD1
Cellular Component	GO:0045111~intermediate filament cytoskeleton	4	NSFL1C, STAG2, TACC1, SMG7
Cellular Component	GO:0045178~basal part of cell	3	FAP, ITGA2, HOMER3
Cellular Component	GO:0080008~Cul4-RING E3 ubiquitin ligase complex	3	FBXW5, RNF7, DCAF5
Cellular Component	GO:0034666~integrin alpha2-beta1 complex	2	ITGB1, ITGA2
Molecular Function	GO:0008270~zinc ion binding	53	CPM, RNF10, KDM5C, RNF14, PHF20, OTUD7B, CNDP1, LIMD2, NPEPPS, ING2, DPF1, CA9, KAT7, ATXN7L3, KCMF1, SORD, BAZ1A, ZDHHC16, PHF20L1, PYGO2, MTF2, NEIL1, S100A8, LOC100524034, GLO1, ACMSD, LIMA1, RNF215, ZSWIM8, POLR2I, RNF130, MORC2, CREBBP, BRPF1, ZRANB2, DTNB, SETDB1, ERAP1, ESRRB, NR1H3, MARCH5, ESR1, RNF146, RNF145, MEX3A, NR6A1, WT1, LHX6, RNF181, TRIM31, RNF185, AARS, LHX8
Molecular Function	GO:0003682~chromatin binding	17	SMAD4, CREBBP, CCNT1, TSHZ1, PAX6, SMAD6, MSL1, PYGO2, KAT2B, ING2, REST, WDR82, POLD1, TPR, GMNC, HMGN3, ASF1A
Molecular Function	GO:0000978~RNA polymerase II core promoter proximal region sequence-specific DNA binding	14	NFAT5, ZNF395, SMAD4, SRF, NR1H3, ETV1, PAX6, FOS, SMAD6, ETV6, NR6A1, FUBP3, SP1, E2F4
Molecular Function	GO:0000981~RNA polymerase II transcription factor activity, sequence-specific DNA binding	12	ZNF18, FOXR1, TFAP2C, REST, SP1, SP4, ETV1, PHB, FOXM1, FOXP3, RUNX1, ETV6
Molecular Function	GO:0001077~transcriptional activator activity, RNA polymerase II core promoter proximal region sequence-specific binding	11	NFAT5, SMAD4, TFAP2C, NR6A1, FUBP3, WT1, SRF, NR1H3, ETV1, PAX6, ETV6
Molecular Function	GO:0035091~phosphatidylinositol binding	7	ING2, HIP1, FES, SNX15, TULP3, SNX10, SNX5
Molecular Function	GO:0005496~steroid binding	6	PAQR8, PAQR7, ESRRB, NR1H3, ESR1
Molecular Function	GO:0009055~electron carrier activity	6	LOC100525869, ACADL, GLRX5, ACAD9, ETFDH, ACADSB
Molecular Function	GO:0003707~steroid hormone receptor activity	6	PAQR8, PAQR7, NR6A1, ESRRB, NR1H3
Molecular Function	GO:0008289~lipid binding	6	GLTP, UNC119B, STARD7, BPIFB5, APOD, ATP5G1
Molecular Function	GO:0008017~microtubule binding	5	MAP10, GAS2L1, GAPDH, RAB11A, DNM1
Molecular Function	GO:0000062~fatty-acyl-CoA binding	4	ACBD6, ACADL, ACAD9, ACADSB
Molecular Function	GO:0035256~G-protein coupled glutamate receptor binding	3	HOMER1, HOMER2, HOMER3
Molecular Function	GO:0004861~cyclin-dependent protein serine/threonine kinase inhibitor activity	3	KAT2B, HEXIM2, CDKN2B
Molecular Function	GO:0008234~cysteine-type peptidase activity	3	CTSL, CTSK, CTSH
