# Supplementary material for: Cocultured porcine granulosa cells respond to excess non-esterified fatty acids during in vitro maturation
Source: J Ovarian Res. 2021 Oct 28;14:142. doi: 10.1186/s13048-021-00904-y (PMC8554973; doi:10.1186/s13048-021-00904-y)
Supplement: Supplementary file 2 — Additional file 2. [file 13048_2021_904_MOESM2_ESM.xls]

## Sheet: Sheet0
Supplemental Table S2 Information of 876 DEGs
Fold Change	P-value	Mean acroo condition	ID	Symbol	Entrez Gene Name	Location	Type(s)
1,292	1,53E-02	7,804	AAK1	AAK1	AP2 associated kinase 1	Cytoplasm	kinase
-1,320	2,12E-02	12,410	AARS	AARS1	alanyl-tRNA synthetase 1	Cytoplasm	enzyme
-1,283	3,49E-02	9,534	ABCC1	ABCC1	ATP binding cassette subfamily C member 1	Plasma Membrane	transporter
1,359	4,66E-02	13,017	ABCD1	ABCD1	ATP binding cassette subfamily D member 1	Plasma Membrane	transporter
1,286	3,77E-02	9,429	ABCD4	ABCD4	ATP binding cassette subfamily D member 4	Cytoplasm	transporter
1,230	3,22E-02	10,585	BAT5	ABHD16A	abhydrolase domain containing 16A, phospholipase	Other	enzyme
-1,217	4,65E-02	8,435	ABHD17B	ABHD17B	abhydrolase domain containing 17B, depalmitoylase	Plasma Membrane	peptidase
1,201	4,01E-02	8,465	ABT1	ABT1	activator of basal transcription 1	Nucleus	transcription regulator
1,356	1,04E-02	8,451	ACAD10	ACAD10	acyl-CoA dehydrogenase family member 10	Cytoplasm	enzyme
-1,247	3,14E-02	9,135	ACAD9	ACAD9	acyl-CoA dehydrogenase family member 9	Cytoplasm	enzyme
1,262	3,01E-02	10,811	ACADL	ACADL	acyl-CoA dehydrogenase long chain	Cytoplasm	enzyme
-1,245	2,80E-02	11,047	ACADSB	ACADSB	acyl-CoA dehydrogenase short/branched chain	Cytoplasm	enzyme
-1,284	3,53E-02	13,637	ACBD6	ACBD6	acyl-CoA binding domain containing 6	Cytoplasm	other
1,285	4,57E-02	7,927	ACER2	ACER2	alkaline ceramidase 2	Cytoplasm	enzyme
1,242	2,33E-02	8,684	ACER3	ACER3	alkaline ceramidase 3	Cytoplasm	enzyme
1,340	7,68E-03	8,202	ACMSD	ACMSD	aminocarboxymuconate semialdehyde decarboxylase	Cytoplasm	enzyme
-1,301	4,31E-02	14,075	ACP1	ACP1	acid phosphatase 1	Cytoplasm	phosphatase
1,238	4,23E-02	13,681	ACSF2	ACSF2	acyl-CoA synthetase family member 2	Cytoplasm	enzyme
1,396	9,19E-03	12,590	ACTN1	ACTN1	actinin alpha 1	Cytoplasm	transcription regulator
-1,233	1,91E-02	10,060	ADAM15	ADAM15	ADAM metallopeptidase domain 15	Plasma Membrane	peptidase
-1,211	3,25E-02	8,344	ADAM5	ADAM5	ADAM metallopeptidase domain 5 (pseudogene)	Other	other
-1,220	3,74E-02	8,200	ADAMTS17	ADAMTS17	ADAM metallopeptidase with thrombospondin type 1 motif 17	Extracellular Space	other
1,299	6,88E-03	8,623	ADAT1	ADAT1	adenosine deaminase tRNA specific 1	Other	enzyme
-1,219	3,54E-02	8,297	ADCK5	ADCK5	aarF domain containing kinase 5	Cytoplasm	kinase
-1,232	4,72E-02	8,078	ADCY9	ADCY9	adenylate cyclase 9	Plasma Membrane	enzyme
-1,516	2,60E-02	11,419	ADGRG1	ADGRG1	adhesion G protein-coupled receptor G1	Plasma Membrane	G-protein coupled receptor
1,313	1,49E-02	8,183	GPR97	ADGRG3	adhesion G protein-coupled receptor G3	Plasma Membrane	G-protein coupled receptor
1,386	1,80E-02	8,612	ADGRG7	ADGRG7	adhesion G protein-coupled receptor G7	Plasma Membrane	G-protein coupled receptor
-1,209	2,82E-02	8,878	LPHN2	ADGRL2	adhesion G protein-coupled receptor L2	Plasma Membrane	G-protein coupled receptor
-1,374	8,18E-03	9,733	ADPGK	ADPGK	ADP dependent glucokinase	Plasma Membrane	kinase
-1,282	3,66E-02	8,729	AFAP1L1	AFAP1L1	actin filament associated protein 1 like 1	Other	other
1,250	3,34E-02	8,724	AFG3L2	AFG3L2	AFG3 like matrix AAA peptidase subunit 2	Cytoplasm	peptidase
1,499	8,63E-03	14,261	EIF2C1	AGO1	argonaute RISC component 1	Cytoplasm	translation regulator
1,545	5,27E-03	13,341	EIF2C2	AGO2	argonaute RISC catalytic component 2	Cytoplasm	translation regulator
1,573	1,88E-03	10,562	AGPS	AGPS	alkylglycerone phosphate synthase	Cytoplasm	enzyme
-1,231	4,17E-02	8,465	AGTPBP1	AGTPBP1	ATP/GTP binding carboxypeptidase 1	Nucleus	peptidase
1,210	3,13E-02	8,145	AHCTF1	AHCTF1	AT-hook containing transcription factor 1	Nucleus	transcription regulator
1,206	4,69E-02	8,575	AIG1	AIG1	androgen induced 1	Other	enzyme
1,232	3,06E-02	7,694	AK7	AK7	adenylate kinase 7	Cytoplasm	kinase
-1,270	2,35E-02	14,536	AKR1CL1	AKR1C8P	aldo-keto reductase family 1 member C8, pseudogene	Other	other
-1,362	4,21E-02	10,493	AKR1E2	AKR1E2	aldo-keto reductase family 1 member E2	Cytoplasm	enzyme
1,347	1,76E-02	13,907	ALDH9A1	ALDH9A1	aldehyde dehydrogenase 9 family member A1	Cytoplasm	enzyme
-1,237	2,72E-02	8,506	ALKBH7	ALKBH7	alkB homolog 7	Cytoplasm	other
-1,224	2,82E-02	9,839	AMACR	AMACR	alpha-methylacyl-CoA racemase	Cytoplasm	enzyme
-1,449	2,54E-02	8,434	AMBN	AMBN	ameloblastin	Extracellular Space	growth factor
1,240	2,77E-02	8,496	AMDHD1	AMDHD1	amidohydrolase domain containing 1	Cytoplasm	enzyme
-1,299	2,62E-02	11,971	ANGPTL2	ANGPTL2	angiopoietin like 2	Extracellular Space	other
1,319	4,50E-02	9,175	ANKRD42	ANKRD42	ankyrin repeat domain 42	Nucleus	transcription regulator
1,238	3,65E-02	8,136	ANKRD60	ANKRD60	ankyrin repeat domain 60	Other	other
1,265	2,31E-02	8,545	FAM173A	ANTKMT	adenine nucleotide translocase lysine methyltransferase	Cytoplasm	enzyme
-1,293	1,74E-02	15,281	ANXA2	ANXA2	annexin A2	Plasma Membrane	other
1,339	1,30E-02	8,619	AP1AR	AP1AR	adaptor related protein complex 1 associated regulatory protein	Cytoplasm	other
-1,242	3,90E-02	8,134	AP4M1	AP4M1	adaptor related protein complex 4 subunit mu 1	Cytoplasm	other
-1,235	4,49E-02	9,635	MUDENG	AP5M1	adaptor related protein complex 5 subunit mu 1	Cytoplasm	other
-1,387	1,45E-02	11,593	APOD	APOD	apolipoprotein D	Extracellular Space	transporter
-1,207	4,69E-02	8,299	APOL6	APOL6	apolipoprotein L6	Extracellular Space	transporter
-1,305	2,64E-02	7,968	ARAP3	ARAP3	ArfGAP with RhoGAP domain, ankyrin repeat and PH domain 3	Cytoplasm	other
1,456	2,37E-02	12,861	ARCN1	ARCN1	archain 1	Cytoplasm	other
1,302	2,24E-02	8,432	ARHGAP11A	ARHGAP11A	Rho GTPase activating protein 11A	Cytoplasm	other
1,277	2,75E-02	9,319	ARHGAP17	ARHGAP17	Rho GTPase activating protein 17	Cytoplasm	other
-1,267	4,45E-02	7,799	SH3D20	ARHGAP27	Rho GTPase activating protein 27	Cytoplasm	other
-1,215	4,15E-02	8,296	ARHGAP4	ARHGAP4	Rho GTPase activating protein 4	Cytoplasm	other
1,220	3,38E-02	8,364	ARHGEF12	ARHGEF12	Rho guanine nucleotide exchange factor 12	Cytoplasm	other
1,235	2,70E-02	8,491	C6orf211	ARMT1	acidic residue methyltransferase 1	Other	enzyme
-1,275	1,01E-02	8,355	ARRDC3	ARRDC3	arrestin domain containing 3	Plasma Membrane	other
1,662	5,04E-04	14,653	ASAP3	ASAP3	ArfGAP with SH3 domain, ankyrin repeat and PH domain 3	Plasma Membrane	other
1,323	3,43E-02	8,608	ASCC1	ASCC1	activating signal cointegrator 1 complex subunit 1	Nucleus	transcription regulator
1,311	4,74E-02	9,090	ASCC3	ASCC3	activating signal cointegrator 1 complex subunit 3	Cytoplasm	enzyme
-1,276	3,08E-02	10,731	ASF1A	ASF1A	anti-silencing function 1A histone chaperone	Nucleus	other
-1,385	2,09E-02	9,697	ASL	ASL	argininosuccinate lyase	Cytoplasm	enzyme
1,247	3,46E-02	13,324	ASRGL1	ASRGL1	asparaginase and isoaspartyl peptidase 1	Cytoplasm	enzyme
-1,285	2,25E-02	7,879	ASS1	ASS1	argininosuccinate synthase 1	Cytoplasm	enzyme
1,427	3,39E-02	13,853	ASTN1	ASTN1	astrotactin 1	Other	other
1,235	2,63E-02	11,161	ATF6	ATF6	activating transcription factor 6	Cytoplasm	transcription regulator
-1,456	1,52E-02	12,151	ATG3	ATG3	autophagy related 3	Cytoplasm	enzyme
1,258	2,13E-02	8,889	ATP1B3	ATP1B3	ATPase Na+/K+ transporting subunit beta 3	Plasma Membrane	transporter
1,688	3,22E-02	8,215	ATP2B1	ATP2B1	ATPase plasma membrane Ca2+ transporting 1	Plasma Membrane	transporter
1,404	3,07E-02	14,384	ATP5F1E	ATP5F1E	ATP synthase F1 subunit epsilon	Cytoplasm	other
-1,211	4,22E-02	13,503	ATP5IF1	ATP5IF1	ATP synthase inhibitory factor subunit 1	Cytoplasm	other
-1,413	2,54E-02	13,468	ATP5G1	ATP5MC1	ATP synthase membrane subunit c locus 1	Cytoplasm	transporter
-1,248	1,88E-02	13,786	ATP5O	ATP5PO	ATP synthase peripheral stalk subunit OSCP	Cytoplasm	transporter
1,373	4,28E-02	8,872	ATP6V0A2	ATP6V0A2	ATPase H+ transporting V0 subunit a2	Cytoplasm	transporter
-1,386	8,41E-03	7,463	ATP6V1B1	ATP6V1B1	ATPase H+ transporting V1 subunit B1	Cytoplasm	transporter
-1,214	4,47E-02	8,033	ATP7A	ATP7A	ATPase copper transporting alpha	Plasma Membrane	transporter
-1,221	4,45E-02	12,026	ATXN10	ATXN10	ataxin 10	Cytoplasm	other
-1,238	2,58E-02	8,071	ATXN7L3	ATXN7L3	ataxin 7 like 3	Nucleus	transcription regulator
-1,222	2,95E-02	11,721	B2M	B2M	beta-2-microglobulin	Plasma Membrane	transmembrane receptor
1,202	4,23E-02	8,469	B3GNT8	B3GNT8	UDP-GlcNAc:betaGal beta-1,3-N-acetylglucosaminyltransferase 8	Cytoplasm	enzyme
-1,437	2,68E-03	9,422	BAG1	BAG1	BAG cochaperone 1	Cytoplasm	other
1,261	3,40E-02	8,788	BAMBI	BAMBI	BMP and activin membrane bound inhibitor	Plasma Membrane	other
-1,251	2,17E-02	8,539	BATF3	BATF3	basic leucine zipper ATF-like transcription factor 3	Nucleus	transcription regulator
1,230	2,70E-02	8,567	BAZ1A	BAZ1A	bromodomain adjacent to zinc finger domain 1A	Nucleus	other
1,460	2,16E-02	13,110	BCKDK	BCKDK	branched chain keto acid dehydrogenase kinase	Cytoplasm	kinase
1,292	1,61E-02	9,574	BCORL1	BCORL1	BCL6 corepressor like 1	Nucleus	transcription regulator
-1,208	3,94E-02	8,566	BDP1	BDP1	B double prime 1, subunit of RNA polymerase III transcription initiation factor IIIB	Nucleus	transcription regulator
-1,356	1,68E-02	9,948	BIN1	BIN1	bridging integrator 1	Nucleus	other
-1,211	3,84E-02	8,464	BIVM	BIVM	basic, immunoglobulin-like variable motif containing	Extracellular Space	other
-1,237	1,98E-02	12,227	BLMH	BLMH	bleomycin hydrolase	Cytoplasm	peptidase
1,269	2,66E-02	8,882	BLOC1S2	BLOC1S2	biogenesis of lysosomal organelles complex 1 subunit 2	Cytoplasm	other
-1,208	4,09E-02	8,027	BNC1	BNC1	basonuclin 1	Nucleus	transcription regulator
1,284	1,57E-02	8,877	BNIP3L	BNIP3L	BCL2 interacting protein 3 like	Cytoplasm	other
-1,218	4,77E-02	7,689	PLUNC	BPIFA1	BPI fold containing family A member 1	Extracellular Space	other
1,412	4,07E-02	11,274	BROX	BROX	BRO1 domain and CAAX motif containing	Cytoplasm	other
-1,299	8,05E-03	8,425	BRPF1	BRPF1	bromodomain and PHD finger containing 1	Nucleus	transporter
-1,420	3,16E-02	7,650	BRWD1	BRWD1	bromodomain and WD repeat domain containing 1	Nucleus	transcription regulator
1,283	2,66E-02	8,669	BSN	BSN	bassoon presynaptic cytomatrix protein	Plasma Membrane	other
1,209	4,24E-02	7,662	C10orf99	C10orf99	chromosome 10 open reading frame 99	Extracellular Space	cytokine
-1,229	4,22E-02	7,638	C2CD2	C2CD2	C2 calcium dependent domain containing 2	Cytoplasm	other
-1,221	2,83E-02	8,522	C3orf18	C3orf18	chromosome 3 open reading frame 18	Other	other
-1,208	4,67E-02	8,339	C6orf118	C6orf118	chromosome 6 open reading frame 118	Other	other
-1,201	3,49E-02	8,205	C6orf226	C6orf226	chromosome 6 open reading frame 226	Other	other
1,240	2,99E-02	8,359	CA9	CA9	carbonic anhydrase 9	Nucleus	enzyme
-1,449	3,03E-02	10,872	CACHD1	CACHD1	cache domain containing 1	Other	other
1,537	3,00E-03	14,392	C19orf29OS	CACTIN-AS1	CACTIN antisense RNA 1	Other	other
-1,321	2,14E-02	10,429	C9orf89	CARD19	caspase recruitment domain family member 19	Cytoplasm	other
-1,235	3,38E-02	8,270	CARS	CARS1	cysteinyl-tRNA synthetase 1	Cytoplasm	enzyme
1,272	3,19E-02	8,304	CARTPT	CARTPT	CART prepropeptide	Extracellular Space	other
1,281	2,33E-02	8,528	CASP8	CASP8	caspase 8	Nucleus	peptidase
-1,267	4,12E-02	8,380	CATSPER1	CATSPER1	cation channel sperm associated 1	Plasma Membrane	ion channel
1,264	3,73E-02	8,765	CATSPER2	CATSPER2	cation channel sperm associated 2	Plasma Membrane	ion channel
1,217	4,60E-02	8,115	KIAA1407	CCDC191	coiled-coil domain containing 191	Other	other
1,299	4,45E-02	8,598	CCDC39	CCDC39	coiled-coil domain containing 39	Cytoplasm	other
1,303	1,72E-02	8,169	CCKBR	CCKBR	cholecystokinin B receptor	Plasma Membrane	G-protein coupled receptor
1,221	4,14E-02	8,079	CCNT1	CCNT1	cyclin T1	Nucleus	transcription regulator
1,447	1,38E-02	11,659	CCNY	CCNY	cyclin Y	Nucleus	other
-1,392	2,11E-02	12,926	CCNYL1	CCNYL1	cyclin Y like 1	Plasma Membrane	other
1,382	4,27E-02	13,501	CCR1	CCR1	C-C motif chemokine receptor 1	Plasma Membrane	G-protein coupled receptor
1,236	2,85E-02	8,197	CD2	CD2	CD2 molecule	Plasma Membrane	transmembrane receptor
-1,232	3,10E-02	8,270	CD38	CD38	CD38 molecule	Plasma Membrane	enzyme
-1,265	1,59E-02	15,197	CD63	CD63	CD63 molecule	Plasma Membrane	other
1,210	4,74E-02	8,004	CD80	CD80	CD80 molecule	Plasma Membrane	transmembrane receptor
1,353	4,10E-02	8,385	CD86	CD86	CD86 molecule	Plasma Membrane	transmembrane receptor
1,426	1,98E-02	12,986	CDC123	CDC123	cell division cycle 123	Cytoplasm	other
-1,217	3,36E-02	8,205	CDC20B	CDC20B	cell division cycle 20B	Other	other
-1,249	3,77E-02	10,079	CDC45L	CDC45	cell division cycle 45	Nucleus	other
1,503	4,86E-03	13,380	CDCA7	CDCA7	cell division cycle associated 7	Nucleus	other
-1,208	3,60E-02	8,493	PCTK3	CDK18	cyclin dependent kinase 18	Cytoplasm	kinase
-1,525	1,60E-02	11,170	CDK19	CDK19	cyclin dependent kinase 19	Nucleus	kinase
-1,217	4,06E-02	8,180	CDKN2B	CDKN2B	cyclin dependent kinase inhibitor 2B	Nucleus	transcription regulator
-1,216	4,84E-02	8,658	CENPA	CENPA	centromere protein A	Nucleus	other
1,373	1,61E-02	8,532	CENPC	CENPC	centromere protein C	Nucleus	other
-1,255	3,21E-02	7,838	CENPT	CENPT	centromere protein T	Cytoplasm	other
-1,257	1,34E-02	8,511	CERS1	CERS1	ceramide synthase 1	Cytoplasm	enzyme
1,224	3,90E-02	7,595	LASS3	CERS3	ceramide synthase 3	Nucleus	transcription regulator
-1,250	2,32E-02	11,486	CCDC104	CFAP36	cilia and flagella associated protein 36	Extracellular Space	other
1,246	4,14E-02	8,550	CFAP70	CFAP70	cilia and flagella associated protein 70	Cytoplasm	other
-1,309	1,17E-02	8,559	CGN	CGN	cingulin	Plasma Membrane	other
-1,364	2,86E-03	10,398	CHCHD3	CHCHD3	coiled-coil-helix-coiled-coil-helix domain containing 3	Cytoplasm	transcription regulator
-1,641	2,23E-02	9,125	CHD2	CHD2	chromodomain helicase DNA binding protein 2	Nucleus	enzyme
-1,265	2,05E-02	8,138	CHST15	CHST15	carbohydrate sulfotransferase 15	Plasma Membrane	enzyme
-1,233	2,40E-02	7,733	CLPS	CLPS	colipase	Extracellular Space	other
1,253	2,71E-02	8,016	CNDP1	CNDP1	carnosine dipeptidase 1	Cytoplasm	peptidase
-1,242	2,48E-02	8,190	CNFN	CNFN	cornifelin	Cytoplasm	other
1,233	3,92E-02	7,954	CNGA3	CNGA3	cyclic nucleotide gated channel subunit alpha 3	Plasma Membrane	ion channel
1,377	1,39E-02	11,915	C2orf64	COA5	cytochrome c oxidase assembly factor 5	Cytoplasm	other
-1,258	1,94E-02	10,816	COPA	COPA	COPI coat complex subunit alpha	Cytoplasm	transporter
-1,282	7,90E-03	8,490	COQ2	COQ2	coenzyme Q2, polyprenyltransferase	Cytoplasm	enzyme
-1,386	1,15E-02	9,277	COX15	COX15	cytochrome c oxidase assembly homolog COX15	Cytoplasm	enzyme
-1,330	2,59E-02	14,735	COX5B	COX5B	cytochrome c oxidase subunit 5B	Cytoplasm	enzyme
-1,284	2,43E-02	8,921	COX6B	COX6B1	cytochrome c oxidase subunit 6B1	Cytoplasm	enzyme
-1,308	4,84E-02	11,961	COX8A	COX8A	cytochrome c oxidase subunit 8A	Cytoplasm	enzyme
-1,260	4,44E-02	8,807	CPM	CPM	carboxypeptidase M	Plasma Membrane	peptidase
1,228	4,38E-02	8,151	CPNE4	CPNE4	copine 4	Cytoplasm	other
-1,280	1,03E-02	8,385	CREBBP	CREBBP	CREB binding protein	Nucleus	transcription regulator
-1,277	4,48E-02	8,645	CREM	CREM	cAMP responsive element modulator	Nucleus	transcription regulator
1,321	1,68E-02	8,567	CSE1L	CSE1L	chromosome segregation 1 like	Nucleus	transporter
1,226	3,57E-02	8,458	CSF1	CSF1	colony stimulating factor 1	Extracellular Space	cytokine
-1,240	3,21E-02	8,223	CSMD1	CSMD1	CUB and Sushi multiple domains 1	Plasma Membrane	other
-1,204	3,74E-02	9,187	CSNK1A1	CSNK1A1	casein kinase 1 alpha 1	Cytoplasm	kinase
-1,414	1,42E-02	11,195	CSNK2A2	CSNK2A2	casein kinase 2 alpha 2	Cytoplasm	kinase
-1,225	2,61E-02	8,393	CTDP1	CTDP1	CTD phosphatase subunit 1	Nucleus	phosphatase
1,283	1,70E-02	8,342	CTDSPL2	CTDSPL2	CTD small phosphatase like 2	Nucleus	phosphatase
-1,402	2,62E-02	15,335	CTSH	CTSH	cathepsin H	Cytoplasm	peptidase
1,211	2,85E-02	11,992	CTSK	CTSK	cathepsin K	Cytoplasm	peptidase
-1,540	1,41E-02	10,676	CTSL	CTSL	cathepsin L	Cytoplasm	peptidase
-1,255	4,30E-02	8,292	CTSZ	CTSZ	cathepsin Z	Cytoplasm	peptidase
-1,327	1,17E-02	8,427	CUEDC2	CUEDC2	CUE domain containing 2	Extracellular Space	other
-1,457	2,71E-02	13,736	CUL1	CUL1	cullin 1	Nucleus	enzyme
1,235	2,85E-02	9,157	CUX1	CUX1	cut like homeobox 1	Nucleus	transcription regulator
-1,212	4,06E-02	8,200	CXCL12	CXCL12	C-X-C motif chemokine ligand 12	Extracellular Space	cytokine
-1,473	3,25E-02	11,268	CXCL14	CXCL14	C-X-C motif chemokine ligand 14	Extracellular Space	cytokine
1,390	1,72E-02	14,305	CXCR4	CXCR4	C-X-C motif chemokine receptor 4	Plasma Membrane	G-protein coupled receptor
-1,297	1,97E-02	9,825	CXorf38	CXorf38	chromosome X open reading frame 38	Other	other
-1,231	2,11E-02	8,018	CXorf66	CXorf66	chromosome X open reading frame 66	Other	other
1,246	3,32E-02	8,411	CYBASC3	CYB561A3	cytochrome b561 family member A3	Cytoplasm	other
-1,220	2,70E-02	8,005	CYB561D1	CYB561D1	cytochrome b561 family member D1	Other	other
1,287	2,11E-02	8,348	CYP4V2	CYP4V2	cytochrome P450 family 4 subfamily V member 2	Cytoplasm	enzyme
-1,274	3,40E-02	11,239	CYP51A1	CYP51A1	cytochrome P450 family 51 subfamily A member 1	Cytoplasm	enzyme
1,313	5,57E-03	8,385	C9orf169	CYSRT1	cysteine rich tail 1	Cytoplasm	other
1,244	2,61E-02	9,018	CYTH1	CYTH1	cytohesin 1	Cytoplasm	other
-1,260	2,23E-02	10,520	DAP3	DAP3	death associated protein 3	Cytoplasm	other
-1,260	2,51E-02	8,340	DCAF5	DCAF5	DDB1 and CUL4 associated factor 5	Cytoplasm	other
1,229	2,37E-02	7,998	DCAF8	DCAF8	DDB1 and CUL4 associated factor 8	Nucleus	other
1,281	3,50E-02	13,498	DDIT4	DDIT4	DNA damage inducible transcript 4	Cytoplasm	other
-1,215	2,61E-02	8,280	DDX11	DDX11	DEAD/H-box helicase 11	Cytoplasm	enzyme
1,409	2,20E-02	13,400	DDX39A	DDX39A	DExD-box helicase 39A	Nucleus	enzyme
1,462	7,92E-03	9,212	DDX3X	DDX3X	DEAD-box helicase 3 X-linked	Cytoplasm	enzyme
1,202	4,77E-02	11,972	FAM45A	DENND10	DENN domain containing 10	Other	other
-1,205	3,76E-02	8,354	DEPDC5	DEPDC5	DEP domain containing 5, GATOR1 subcomplex subunit	Cytoplasm	other
-1,279	4,12E-02	11,154	PPPDE1	DESI2	desumoylating isopeptidase 2	Cytoplasm	enzyme
-1,331	1,00E-02	7,902	DGAT2	DGAT2	diacylglycerol O-acyltransferase 2	Cytoplasm	enzyme
-1,291	2,03E-02	9,113	DGUOK	DGUOK	deoxyguanosine kinase	Cytoplasm	kinase
-1,207	3,24E-02	8,047	DHRS1	DHRS1	dehydrogenase/reductase 1	Cytoplasm	enzyme
1,327	2,43E-02	8,384	DHX36	DHX36	DEAH-box helicase 36	Cytoplasm	enzyme
1,218	3,74E-02	8,445	DIRAS1	DIRAS1	DIRAS family GTPase 1	Plasma Membrane	enzyme
-1,235	2,15E-02	8,999	DLST	DLST	dihydrolipoamide S-succinyltransferase	Cytoplasm	enzyme
1,291	4,98E-02	12,642	DMTN	DMTN	dematin actin binding protein	Plasma Membrane	other
1,340	7,30E-03	11,072	DMXL2	DMXL2	Dmx like 2	Cytoplasm	other
-1,257	3,59E-02	8,228	DNAH9	DNAH9	dynein axonemal heavy chain 9	Cytoplasm	other
1,271	4,39E-02	9,231	CASC1	DNAI7	dynein axonemal intermediate chain 7	Cytoplasm	other
1,263	1,46E-02	8,440	DNASE2	DNASE2	deoxyribonuclease 2, lysosomal	Cytoplasm	enzyme
-1,262	2,97E-02	8,329	DNM1	DNM1	dynamin 1	Cytoplasm	enzyme
-1,219	3,00E-02	8,608	DNTTIP1	DNTTIP1	deoxynucleotidyltransferase terminal interacting protein 1	Nucleus	ligand-dependent nuclear receptor
-1,332	9,27E-03	10,805	DNTTIP2	DNTTIP2	deoxynucleotidyltransferase terminal interacting protein 2	Nucleus	other
-1,215	3,04E-02	8,355	DPF1	DPF1	double PHD fingers 1	Nucleus	other
1,276	3,55E-02	8,462	DPM1	DPM1	dolichyl-phosphate mannosyltransferase subunit 1, catalytic	Cytoplasm	enzyme
1,229	2,31E-02	8,169	DPP6	DPP6	dipeptidyl peptidase like 6	Plasma Membrane	other
1,291	1,49E-02	8,349	DPP8	DPP8	dipeptidyl peptidase 8	Cytoplasm	peptidase
-1,254	3,67E-02	7,999	DPY19L2	DPY19L2	dpy-19 like 2	Nucleus	other
1,270	2,98E-02	7,933	DPY19L4	DPY19L4	dpy-19 like 4	Other	other
1,202	3,82E-02	8,434	DSPP	DSPP	dentin sialophosphoprotein	Extracellular Space	other
1,337	2,15E-02	14,228	DTNB	DTNB	dystrobrevin beta	Plasma Membrane	other
1,258	2,69E-02	8,267	DUOXA1	DUOXA1	dual oxidase maturation factor 1	Plasma Membrane	other
-1,289	3,70E-02	8,062	DUSP3	DUSP3	dual specificity phosphatase 3	Cytoplasm	phosphatase
-1,280	2,59E-02	10,997	DYNLT1	DYNLT1	dynein light chain Tctex-type 1	Cytoplasm	other
1,242	2,75E-02	8,271	E2F4	E2F4	E2F transcription factor 4	Nucleus	transcription regulator
-1,219	3,16E-02	8,350	ECSIT	ECSIT	ECSIT signaling integrator	Nucleus	transcription regulator
-1,253	4,83E-02	8,458	EDN3	EDN3	endothelin 3	Extracellular Space	other
1,232	2,04E-02	8,720	EEF1AKMT2	EEF1AKMT2	EEF1A lysine methyltransferase 2	Cytoplasm	enzyme
-1,402	4,12E-02	14,565	EEF1G	EEF1G	eukaryotic translation elongation factor 1 gamma	Cytoplasm	translation regulator
1,201	3,89E-02	8,448	EFR3A	EFR3A	EFR3 homolog A	Plasma Membrane	other
-1,233	2,10E-02	8,622	EFS	EFS	embryonal Fyn-associated substrate	Cytoplasm	other
-1,272	4,38E-02	8,430	EGR4	EGR4	early growth response 4	Nucleus	transcription regulator
-1,223	4,18E-02	12,015	EIF1	EIF1	eukaryotic translation initiation factor 1	Cytoplasm	translation regulator
-1,228	2,24E-02	10,913	EIF2B2	EIF2B2	eukaryotic translation initiation factor 2B subunit beta	Cytoplasm	other
1,366	2,38E-02	8,688	EIF2D	EIF2D	eukaryotic translation initiation factor 2D	Cytoplasm	transporter
-1,216	3,89E-02	9,640	EIF3L	EIF3L	eukaryotic translation initiation factor 3 subunit L	Cytoplasm	other
-1,271	1,98E-02	8,437	EIF4G3	EIF4G3	eukaryotic translation initiation factor 4 gamma 3	Cytoplasm	translation regulator
-1,263	4,82E-02	9,908	ELL2	ELL2	elongation factor for RNA polymerase II 2	Nucleus	transcription regulator
1,236	2,65E-02	12,364	EMC7	EMC7	ER membrane protein complex subunit 7	Cytoplasm	other
1,310	3,26E-02	8,173	EMP1	EMP1	epithelial membrane protein 1	Plasma Membrane	other
-1,231	2,59E-02	8,182	EPS15	EPS15	epidermal growth factor receptor pathway substrate 15	Cytoplasm	other
1,257	2,82E-02	8,765	ERAP1	ERAP1	endoplasmic reticulum aminopeptidase 1	Extracellular Space	peptidase
-1,265	4,06E-02	11,252	ERP44	ERP44	endoplasmic reticulum protein 44	Cytoplasm	enzyme
-1,216	3,20E-02	8,535	ESR1	ESR1	estrogen receptor 1	Nucleus	ligand-dependent nuclear receptor
1,313	1,11E-02	8,270	ESRRB	ESRRB	estrogen related receptor beta	Nucleus	transcription regulator
-1,387	8,12E-03	8,750	ETFDH	ETFDH	electron transfer flavoprotein dehydrogenase	Cytoplasm	enzyme
-1,228	4,22E-02	8,018	ETV1	ETV1	ETS variant transcription factor 1	Nucleus	transcription regulator
-1,260	2,35E-02	8,385	ETV6	ETV6	ETS variant transcription factor 6	Nucleus	transcription regulator
-1,251	1,73E-02	8,373	DEM1	EXO5	exonuclease 5	Nucleus	enzyme
1,440	2,59E-02	13,665	EXOC7	EXOC7	exocyst complex component 7	Cytoplasm	transporter
1,395	4,83E-02	10,416	EXOC8	EXOC8	exocyst complex component 8	Plasma Membrane	other
1,240	1,94E-02	8,245	EXT2	EXT2	exostosin glycosyltransferase 2	Cytoplasm	enzyme
-1,306	4,43E-02	8,746	FAIM	FAIM	Fas apoptotic inhibitory molecule	Plasma Membrane	other
-1,349	3,51E-02	9,125	FAM114A2	FAM114A2	family with sequence similarity 114 member A2	Other	other
1,315	1,94E-02	8,153	FAM13A	FAM13A	family with sequence similarity 13 member A	Cytoplasm	other
1,457	1,74E-02	14,246	FAM174A	FAM174A	family with sequence similarity 174 member A	Extracellular Space	other
-1,220	3,52E-02	8,229	FAM181B	FAM181B	family with sequence similarity 181 member B	Other	other
1,253	3,84E-02	8,783	C20orf108	FAM210B	family with sequence similarity 210 member B	Extracellular Space	other
-1,204	3,81E-02	8,192	FAM216A	FAM216A	family with sequence similarity 216 member A	Other	other
-1,237	3,96E-02	8,532	C20orf177	FAM217B	family with sequence similarity 217 member B	Other	other
-1,379	1,24E-02	8,336	FAM25A	FAM25A (includes others)	family with sequence similarity 25 member A	Other	other
1,395	4,98E-02	11,609	FAN1	FAN1	FANCD2 and FANCI associated nuclease 1	Nucleus	enzyme
1,360	1,03E-02	8,280	FAP	FAP	fibroblast activation protein alpha	Cytoplasm	peptidase
-1,236	3,40E-02	12,037	FAR1	FAR1	fatty acyl-CoA reductase 1	Cytoplasm	enzyme
-1,225	3,47E-02	13,510	FBLN2	FBLN2	fibulin 2	Extracellular Space	other
-1,310	1,38E-02	8,676	FBP1	FBP1	fructose-bisphosphatase 1	Cytoplasm	phosphatase
1,287	1,18E-02	8,478	FBXL3	FBXL3	F-box and leucine rich repeat protein 3	Nucleus	enzyme
-1,288	2,05E-02	8,849	FBXO42	FBXO42	F-box protein 42	Other	other
-1,236	3,47E-02	8,508	FBXO44	FBXO44	F-box protein 44	Cytoplasm	enzyme
-1,240	3,65E-02	10,328	FBXO9	FBXO9	F-box protein 9	Cytoplasm	enzyme
-1,254	2,38E-02	8,665	FBXW5	FBXW5	F-box and WD repeat domain containing 5	Cytoplasm	other
1,279	1,80E-02	8,179	FCGR2B	FCGR2B	Fc fragment of IgG receptor IIb	Plasma Membrane	transmembrane receptor
-1,209	3,52E-02	8,210	FCRLA	FCRLA	Fc receptor like A	Plasma Membrane	other
-1,263	2,24E-02	8,274	FERMT2	FERMT2	FERM domain containing kindlin 2	Cytoplasm	other
1,218	4,05E-02	8,281	FES	FES	FES proto-oncogene, tyrosine kinase	Cytoplasm	kinase
-1,220	4,04E-02	8,392	FEZF2	FEZF2	FEZ family zinc finger 2	Other	transcription regulator
1,209	2,89E-02	7,893	FFAR3	FFAR3	free fatty acid receptor 3	Plasma Membrane	G-protein coupled receptor
1,258	2,97E-02	8,221	FGF4	FGF4	fibroblast growth factor 4	Extracellular Space	growth factor
1,249	2,45E-02	8,592	FGGY	FGGY	FGGY carbohydrate kinase domain containing	Other	enzyme
-1,267	3,10E-02	8,648	FIBCD1	FIBCD1	fibrinogen C domain containing 1	Other	other
-1,243	3,35E-02	10,371	FKBP1B	FKBP1B	FKBP prolyl isomerase 1B	Cytoplasm	enzyme
1,251	1,65E-02	7,992	FNBP1L	FNBP1L	formin binding protein 1 like	Cytoplasm	other
1,208	2,90E-02	8,353	FNBP4	FNBP4	formin binding protein 4	Nucleus	other
1,214	4,46E-02	9,105	FNTB	FNTB	farnesyltransferase, CAAX box, beta	Cytoplasm	enzyme
1,426	3,92E-02	9,413	FOS	FOS	Fos proto-oncogene, AP-1 transcription factor subunit	Nucleus	transcription regulator
-1,222	3,42E-02	8,449	FOXM1	FOXM1	forkhead box M1	Nucleus	transcription regulator
-1,206	3,34E-02	7,920	FOXP3	FOXP3	forkhead box P3	Nucleus	transcription regulator
1,229	2,83E-02	7,857	FOXR1	FOXR1	forkhead box R1	Nucleus	transcription regulator
-1,374	9,75E-03	9,383	FUBP1	FUBP1	far upstream element binding protein 1	Nucleus	transcription regulator
-1,275	4,83E-02	8,007	FUBP3	FUBP3	far upstream element binding protein 3	Nucleus	transcription regulator
-1,355	2,23E-02	13,967	FYN	FYN	FYN proto-oncogene, Src family tyrosine kinase	Plasma Membrane	kinase
1,304	1,92E-02	8,750	GABPB1	GABPB1	GA binding protein transcription factor subunit beta 1	Nucleus	transcription regulator
-1,264	2,28E-02	8,517	GABPB2	GABPB2	GA binding protein transcription factor subunit beta 2	Nucleus	transcription regulator
1,280	2,46E-02	8,025	GALNTL5	GALNTL5	polypeptide N-acetylgalactosaminyltransferase like 5	Cytoplasm	enzyme
-1,352	4,15E-02	14,198	GAPDH	GAPDH	glyceraldehyde-3-phosphate dehydrogenase	Cytoplasm	enzyme
1,229	3,94E-02	8,318	GAS2L1	GAS2L1	growth arrest specific 2 like 1	Cytoplasm	other
-1,273	1,55E-02	8,734	GAS8	GAS8	growth arrest specific 8	Cytoplasm	other
-1,337	3,45E-02	9,618	GCHFR	GCHFR	GTP cyclohydrolase I feedback regulator	Cytoplasm	other
1,221	4,17E-02	8,665	GCNT1	GCNT1	glucosaminyl (N-acetyl) transferase 1	Cytoplasm	enzyme
-1,274	1,20E-02	9,966	GDPD5	GDPD5	glycerophosphodiester phosphodiesterase domain containing 5	Plasma Membrane	enzyme
-1,282	1,03E-02	9,068	GEMIN5	GEMIN5	gem nuclear organelle associated protein 5	Nucleus	other
-1,296	7,19E-03	10,175	C7orf20	GET4	guided entry of tail-anchored proteins factor 4	Cytoplasm	other
-1,681	1,83E-02	12,530	GFPT2	GFPT2	glutamine-fructose-6-phosphate transaminase 2	Cytoplasm	enzyme
-1,412	4,10E-03	12,058	GGNBP2	GGNBP2	gametogenetin binding protein 2	Other	other
1,217	3,70E-02	8,202	GGPS1	GGPS1	geranylgeranyl diphosphate synthase 1	Cytoplasm	enzyme
1,216	4,21E-02	8,531	GIMAP2	GIMAP2	GTPase, IMAP family member 2	Cytoplasm	other
-1,365	3,16E-02	8,742	GINS1	GINS1	GINS complex subunit 1	Nucleus	other
1,252	4,77E-02	8,081	GINS4	GINS4	GINS complex subunit 4	Nucleus	other
1,255	2,20E-02	7,733	GJD3	GJD3	gap junction protein delta 3	Plasma Membrane	transporter
1,326	4,40E-02	8,167	GKN2	GKN2	gastrokine 2	Extracellular Space	other
1,464	7,69E-03	12,734	GLO1	GLO1	glyoxalase I	Cytoplasm	enzyme
-1,250	4,74E-02	9,674	GLRX5	GLRX5	glutaredoxin 5	Cytoplasm	other
1,408	1,35E-02	14,658	GLT1D1	GLT1D1	glycosyltransferase 1 domain containing 1	Extracellular Space	enzyme
-1,202	3,41E-02	8,603	GLTP	GLTP	glycolipid transfer protein	Cytoplasm	transporter
-1,261	4,69E-02	9,037	GLUL	GLUL	glutamate-ammonia ligase	Cytoplasm	enzyme
1,255	2,20E-02	9,045	GMNC	GMNC	geminin coiled-coil domain containing	Nucleus	other
-1,273	2,56E-02	9,016	GNG2	GNG2	G protein subunit gamma 2	Plasma Membrane	enzyme
-1,252	3,10E-02	9,293	GNPDA1	GNPDA1	glucosamine-6-phosphate deaminase 1	Cytoplasm	enzyme
-1,223	4,30E-02	9,695	GNPTAB	GNPTAB	N-acetylglucosamine-1-phosphate transferase subunits alpha and beta	Cytoplasm	enzyme
1,241	2,11E-02	8,707	GNPTG	GNPTG	N-acetylglucosamine-1-phosphate transferase subunit gamma	Cytoplasm	enzyme
1,210	3,71E-02	8,382	GOLGA3	GOLGA3	golgin A3	Cytoplasm	transporter
1,255	2,62E-02	9,353	GOLGA4	GOLGA4	golgin A4	Cytoplasm	other
1,356	4,44E-02	13,284	GOSR1	GOSR1	golgi SNAP receptor complex member 1	Cytoplasm	transporter
-1,329	4,95E-02	10,204	GPI	GPI	glucose-6-phosphate isomerase	Extracellular Space	enzyme
1,221	2,73E-02	7,886	GPM6A	GPM6A	glycoprotein M6A	Plasma Membrane	ion channel
-1,279	4,66E-02	9,132	GPM6B	GPM6B	glycoprotein M6B	Plasma Membrane	other
1,232	3,27E-02	8,224	GPR12	GPR12	G protein-coupled receptor 12	Plasma Membrane	G-protein coupled receptor
1,248	1,47E-02	8,261	GREB1L	GREB1L	GREB1 like retinoic acid receptor coactivator	Extracellular Space	other
1,445	2,18E-02	14,677	GRIN2C	GRIN2C	glutamate ionotropic receptor NMDA type subunit 2C	Plasma Membrane	ion channel
-1,322	2,12E-02	8,178	GRM5	GRM5	glutamate metabotropic receptor 5	Plasma Membrane	G-protein coupled receptor
-1,211	2,94E-02	9,126	GRN	GRN	granulin precursor	Extracellular Space	growth factor
-1,323	7,04E-03	9,557	GTF2A2	GTF2A2	general transcription factor IIA subunit 2	Nucleus	transcription regulator
1,221	4,41E-02	8,373	GTF2F2	GTF2F2	general transcription factor IIF subunit 2	Nucleus	transcription regulator
-1,299	1,19E-02	7,936	GUF1	GUF1	GTP binding elongation factor GUF1	Cytoplasm	other
1,254	2,13E-02	8,170	HAUS2	HAUS2	HAUS augmin like complex subunit 2	Cytoplasm	other
1,439	2,09E-02	13,195	HCST	HCST	hematopoietic cell signal transducer	Plasma Membrane	transmembrane receptor
1,251	2,04E-02	8,560	HDAC11	HDAC11	histone deacetylase 11	Nucleus	transcription regulator
-1,294	2,33E-02	9,767	HEXIM2	HEXIM2	HEXIM P-TEFb complex subunit 2	Nucleus	transcription regulator
1,235	3,61E-02	8,614	HHAT	HHAT	hedgehog acyltransferase	Cytoplasm	enzyme
-1,372	4,31E-02	15,139	HINT1	HINT1	histidine triad nucleotide binding protein 1	Nucleus	enzyme
1,236	2,03E-02	8,267	HIP1	HIP1	huntingtin interacting protein 1	Cytoplasm	other
1,264	2,04E-02	8,188	HMGN3	HMGN3	high mobility group nucleosomal binding domain 3	Nucleus	other
1,405	1,87E-03	9,399	HNRNPA2B1	HNRNPA2B1	heterogeneous nuclear ribonucleoprotein A2/B1	Nucleus	other
1,385	1,30E-02	9,383	HNRNPH3	HNRNPH3	heterogeneous nuclear ribonucleoprotein H3	Nucleus	other
1,317	5,07E-03	8,522	HOMER1	HOMER1	homer scaffold protein 1	Plasma Membrane	other
1,207	4,34E-02	7,931	HOMER2	HOMER2	homer scaffold protein 2	Plasma Membrane	other
-1,266	1,24E-02	8,239	HOMER3	HOMER3	homer scaffold protein 3	Plasma Membrane	other
-1,277	3,54E-02	13,159	HOXD8	HOXD8	homeobox D8	Nucleus	transcription regulator
-1,258	1,41E-02	8,231	HP	HP	haptoglobin	Extracellular Space	peptidase
-1,223	2,91E-02	8,354	HS6ST1	HS6ST1	heparan sulfate 6-O-sulfotransferase 1	Plasma Membrane	enzyme
-1,328	2,57E-02	12,151	HSD17B10	HSD17B10	hydroxysteroid 17-beta dehydrogenase 10	Cytoplasm	enzyme
1,228	3,41E-02	7,981	HSD17B7	HSD17B7	hydroxysteroid 17-beta dehydrogenase 7	Cytoplasm	enzyme
-1,235	2,79E-02	8,379	HSD3B7	HSD3B7	hydroxy-delta-5-steroid dehydrogenase, 3 beta- and steroid delta-isomerase 7	Cytoplasm	enzyme
-1,388	5,49E-03	14,998	HSPA8	HSPA8	heat shock protein family A (Hsp70) member 8	Cytoplasm	enzyme
1,230	3,62E-02	8,445	HUNK	HUNK	hormonally up-regulated Neu-associated kinase	Cytoplasm	kinase
-1,337	3,52E-02	13,212	IBTK	IBTK	inhibitor of Bruton tyrosine kinase	Cytoplasm	other
1,244	2,14E-02	8,788	IFIT5	IFIT5	interferon induced protein with tetratricopeptide repeats 5	Plasma Membrane	other
-1,215	4,33E-02	9,242	IFNA1	IFNA1/IFNA13	interferon alpha 1	Extracellular Space	cytokine
-1,231	3,37E-02	7,939	IFT140	IFT140	intraflagellar transport 140	Extracellular Space	other
1,284	1,68E-02	8,035	RABL5	IFT22	intraflagellar transport 22	Extracellular Space	other
-1,452	1,29E-02	10,186	IGF1	IGF1	insulin like growth factor 1	Extracellular Space	growth factor
1,292	2,45E-02	8,612	IGSF9	IGSF9	immunoglobulin superfamily member 9	Plasma Membrane	other
1,243	4,47E-02	9,714	IKZF5	IKZF5	IKAROS family zinc finger 5	Nucleus	transcription regulator
-1,228	2,26E-02	8,150	IL17RB	IL17RB	interleukin 17 receptor B	Plasma Membrane	transmembrane receptor
-1,354	8,91E-03	8,594	IL17RC	IL17RC	interleukin 17 receptor C	Plasma Membrane	transmembrane receptor
-1,484	2,98E-02	9,711	IL33	IL33	interleukin 33	Extracellular Space	cytokine
-1,261	3,72E-02	8,164	IMP3	IMP3	IMP U3 small nucleolar ribonucleoprotein 3	Cytoplasm	other
-1,296	1,59E-02	9,814	ING2	ING2	inhibitor of growth family member 2	Nucleus	transcription regulator
-1,253	3,40E-02	11,024	INPP5B	INPP5B	inositol polyphosphate-5-phosphatase B	Plasma Membrane	phosphatase
-1,290	1,95E-02	9,244	C15orf44	INTS14	integrator complex subunit 14	Cytoplasm	other
1,205	3,81E-02	8,478	INTU	INTU	inturned planar cell polarity protein	Cytoplasm	other
-1,233	1,98E-02	8,010	KIAA1683	IQCN	IQ motif containing N	Cytoplasm	other
1,470	3,66E-02	13,295	IQSEC1	IQSEC1	IQ motif and Sec7 domain ArfGEF 1	Cytoplasm	other
1,204	4,28E-02	8,716	IST1	IST1	IST1 factor associated with ESCRT-III	Cytoplasm	other
1,216	4,75E-02	8,335	ITGA2	ITGA2	integrin subunit alpha 2	Plasma Membrane	transmembrane receptor
1,230	4,26E-02	11,836	ITGB1	ITGB1	integrin subunit beta 1	Plasma Membrane	transmembrane receptor
-1,430	3,52E-02	11,102	ITGB3	ITGB3	integrin subunit beta 3	Plasma Membrane	transmembrane receptor
1,277	4,32E-02	8,527	ITPRIP	ITPRIP	inositol 1,4,5-trisphosphate receptor interacting protein	Extracellular Space	other
1,272	3,02E-02	9,463	ITSN2	ITSN2	intersectin 2	Cytoplasm	other
1,294	2,01E-02	8,369	JAKMIP3	JAKMIP3	Janus kinase and microtubule interacting protein 3	Other	other
-1,302	2,28E-02	11,259	JMJD8	JMJD8	jumonji domain containing 8	Cytoplasm	other
-1,427	7,70E-03	12,795	HN1L	JPT2	Jupiter microtubule associated homolog 2	Cytoplasm	other
-1,248	1,91E-02	8,846	KANK1	KANK1	KN motif and ankyrin repeat domains 1	Nucleus	transcription regulator
-1,202	4,91E-02	8,589	KIAA1267	KANSL1	KAT8 regulatory NSL complex subunit 1	Nucleus	other
1,279	1,57E-02	7,943	KANSL1L	KANSL1L	KAT8 regulatory NSL complex subunit 1 like	Other	other
-1,297	3,96E-02	11,492	KAT2B	KAT2B	lysine acetyltransferase 2B	Nucleus	transcription regulator
1,496	1,38E-02	13,916	KAT7	KAT7	lysine acetyltransferase 7	Nucleus	enzyme
1,335	1,66E-02	8,675	KCMF1	KCMF1	potassium channel modulatory factor 1	Extracellular Space	enzyme
-1,282	2,96E-02	8,237	KCNA7	KCNA7	potassium voltage-gated channel subfamily A member 7	Plasma Membrane	ion channel
1,202	4,46E-02	8,238	KCNC4	KCNC4	potassium voltage-gated channel subfamily C member 4	Plasma Membrane	ion channel
1,316	3,05E-02	7,860	KCNMB1	KCNMB1	potassium calcium-activated channel subfamily M regulatory beta subunit 1	Plasma Membrane	ion channel
-1,319	4,37E-02	8,282	KCNT2	KCNT2	potassium sodium-activated channel subfamily T member 2	Plasma Membrane	ion channel
-1,208	4,21E-02	8,173	KCTD12	KCTD12	potassium channel tetramerization domain containing 12	Plasma Membrane	ion channel
1,211	3,83E-02	8,162	KCTD9	KCTD9	potassium channel tetramerization domain containing 9	Other	other
-1,272	1,26E-02	9,224	KDELR1	KDELR1	KDEL endoplasmic reticulum protein retention receptor 1	Cytoplasm	transporter
-1,392	2,03E-02	12,699	KDM5C	KDM5C	lysine demethylase 5C	Nucleus	enzyme
-1,308	2,87E-02	9,664	KHNYN	KHNYN	KH and NYN domain containing	Other	other
-1,232	4,34E-02	8,382	C5orf36	KIAA0825	KIAA0825	Extracellular Space	other
-1,272	1,46E-02	8,126	KIAA1328	KIAA1328	KIAA1328	Other	other
1,229	4,07E-02	8,301	KIF27	KIF27	kinesin family member 27	Cytoplasm	other
-1,280	1,37E-02	8,470	KIFC1	KIFC1	kinesin family member C1	Nucleus	enzyme
-1,333	2,31E-02	9,143	KLHDC9	KLHDC9	kelch domain containing 9	Other	other
-1,244	3,66E-02	8,369	KLHL38	KLHL38	kelch like family member 38	Other	other
1,335	9,39E-03	8,343	KMT5B	KMT5B	lysine methyltransferase 5B	Nucleus	enzyme
-1,225	4,84E-02	8,126	KNG1	KNG1	kininogen 1	Extracellular Space	other
1,394	2,06E-02	12,562	KRT1	KRT1	keratin 1	Cytoplasm	other
-1,285	9,92E-03	8,433	KRT40	KRT40	keratin 40	Cytoplasm	other
-1,260	1,98E-02	8,268	KTI12	KTI12	KTI12 chromatin associated homolog	Other	other
1,396	2,56E-02	8,432	L2HGDH	L2HGDH	L-2-hydroxyglutarate dehydrogenase	Cytoplasm	enzyme
-1,278	3,42E-02	8,106	LALBA	LALBA	lactalbumin alpha	Extracellular Space	enzyme
1,244	4,75E-02	8,462	LAMA2	LAMA2	laminin subunit alpha 2	Extracellular Space	other
1,351	3,33E-02	14,180	LDAH	LDAH	lipid droplet associated hydrolase	Cytoplasm	enzyme
-1,224	2,18E-02	8,117	LDHC	LDHC	lactate dehydrogenase C	Cytoplasm	enzyme
1,320	1,26E-02	8,236	LEMD1	LEMD1	LEM domain containing 1	Other	other
-1,254	2,74E-02	8,259	LGALS8	LGALS8	galectin 8	Extracellular Space	other
-1,237	2,39E-02	7,493	LHX6	LHX6	LIM homeobox 6	Nucleus	transcription regulator
1,206	4,77E-02	8,126	LHX8	LHX8	LIM homeobox 8	Nucleus	transcription regulator
1,290	3,77E-02	8,650	LIMA1	LIMA1	LIM domain and actin binding 1	Cytoplasm	other
1,253	2,46E-02	8,160	LIMD2	LIMD2	LIM domain containing 2	Other	other
-1,225	3,02E-02	8,215	LIN52	LIN52	lin-52 DREAM MuvB core complex component	Nucleus	other
1,337	3,44E-02	13,594	LIN7B	LIN7B	lin-7 homolog B, crumbs cell polarity complex component	Cytoplasm	other
1,335	2,71E-02	14,018	LIPE	LIPE	lipase E, hormone sensitive type	Cytoplasm	enzyme
-1,271	3,90E-02	8,301	C7orf34	LLCFC1	LLLL and CFNLAS motif containing 1	Other	other
1,263	3,53E-02	8,044	LRP12	LRP12	LDL receptor related protein 12	Plasma Membrane	transmembrane receptor
-1,207	3,25E-02	8,190	LRRC27	LRRC27	leucine rich repeat containing 27	Other	other
-1,226	4,92E-02	8,298	LRTM1	LRTM1	leucine rich repeats and transmembrane domains 1	Other	other
1,283	1,91E-02	9,148	LSM12	LSM12	LSM12 homolog	Other	other
1,423	3,47E-02	12,993	LYRM1	LYRM1	LYR motif containing 1	Cytoplasm	other
1,475	2,97E-02	13,581	LZTS3	LZTS3	leucine zipper tumor suppressor family member 3	Cytoplasm	other
1,228	4,48E-02	8,635	MACF1	MACF1	microtubule actin crosslinking factor 1	Cytoplasm	enzyme
-1,273	1,04E-02	9,361	MACROD1	MACROD1	mono-ADP ribosylhydrolase 1	Cytoplasm	enzyme
-1,386	4,21E-02	15,236	MAGED2	MAGED2	MAGE family member D2	Plasma Membrane	other
-1,286	2,04E-02	8,797	MAMDC4	MAMDC4	MAM domain containing 4	Cytoplasm	other
1,298	2,86E-02	9,019	MAP10	MAP10	microtubule associated protein 10	Extracellular Space	other
1,615	4,74E-03	12,863	MAP1A	MAP1A	microtubule associated protein 1A	Cytoplasm	other
-1,234	3,02E-02	8,233	MAP3K20	MAP3K20	mitogen-activated protein kinase kinase kinase 20	Cytoplasm	kinase
1,507	7,15E-03	12,579	MAP3K8	MAP3K8	mitogen-activated protein kinase kinase kinase 8	Cytoplasm	kinase
-1,292	8,03E-03	8,252	MAP4	MAP4	microtubule associated protein 4	Cytoplasm	other
-1,353	8,50E-03	8,267	MAP4K3	MAP4K3	mitogen-activated protein kinase kinase kinase kinase 3	Plasma Membrane	kinase
-1,246	3,01E-02	12,267	MAPK1	MAPK1	mitogen-activated protein kinase 1	Cytoplasm	kinase
1,375	4,04E-02	10,509	MARCH5	MARCHF5	membrane associated ring-CH-type finger 5	Cytoplasm	enzyme
-1,275	3,00E-02	9,009	MARK1	MARK1	microtubule affinity regulating kinase 1	Cytoplasm	kinase
1,206	4,50E-02	8,538	MARVELD2	MARVELD2	MARVEL domain containing 2	Plasma Membrane	other
-1,236	2,14E-02	8,078	MCCC2	MCCC2	methylcrotonoyl-CoA carboxylase 2	Cytoplasm	enzyme
-1,356	1,13E-02	9,469	MDK	MDK	midkine	Extracellular Space	growth factor
-1,265	4,55E-02	13,049	ME2	ME2	malic enzyme 2	Cytoplasm	enzyme
-1,239	4,70E-02	9,326	METAP1	METAP1	methionyl aminopeptidase 1	Cytoplasm	peptidase
-1,272	4,05E-02	9,473	FAM119A	METTL21A	methyltransferase like 21A	Nucleus	enzyme
1,384	2,76E-03	8,481	C12orf26	METTL25	methyltransferase like 25	Extracellular Space	other
1,282	4,29E-02	13,434	MEX3A	MEX3A	mex-3 RNA binding family member A	Cytoplasm	other
-1,217	2,97E-02	8,196	MFAP3	MFAP3	microfibril associated protein 3	Extracellular Space	other
1,225	3,73E-02	8,747	MFGE8	MFGE8	milk fat globule EGF and factor V/VIII domain containing	Extracellular Space	other
1,446	3,39E-02	10,678	MFSD1	MFSD1	major facilitator superfamily domain containing 1	Cytoplasm	transporter
-1,230	3,46E-02	7,738	MFSD4A	MFSD4A	major facilitator superfamily domain containing 4A	Other	other
1,211	4,77E-02	9,083	MFSD9	MFSD9	major facilitator superfamily domain containing 9	Other	transporter
-1,220	2,93E-02	12,743	MGAT2	MGAT2	alpha-1,6-mannosyl-glycoprotein 2-beta-N-acetylglucosaminyltransferase	Cytoplasm	enzyme
-1,426	2,16E-02	13,958	MINOS1	MICOS10	mitochondrial contact site and cristae organizing system subunit 10	Cytoplasm	other
-1,232	3,50E-02	10,747	C19orf70	MICOS13	mitochondrial contact site and cristae organizing system subunit 13	Cytoplasm	other
1,201	4,26E-02	8,247	MIER1	MIER1	MIER1 transcriptional regulator	Nucleus	transcription regulator
-1,233	2,11E-02	8,355	MINDY3	MINDY3	MINDY lysine 48 deubiquitinase 3	Nucleus	enzyme
1,273	2,53E-02	8,308	MIR1307	mir-1307	microRNA 1307	Cytoplasm	microRNA
-1,229	3,96E-02	8,695	MIR497	mir-497	microRNA 497	Cytoplasm	microRNA
-1,246	2,51E-02	8,501	MOBKL2C	MOB3C	MOB kinase activator 3C	Other	other
-1,217	3,89E-02	8,146	MON2	MON2	MON2 homolog, regulator of endosome-to-Golgi trafficking	Cytoplasm	other
-1,254	3,76E-02	8,862	MORC2	MORC2	MORC family CW-type zinc finger 2	Nucleus	enzyme
1,451	8,00E-03	12,531	MPC2	MPC2	mitochondrial pyruvate carrier 2	Plasma Membrane	other
-1,227	2,82E-02	8,999	MPND	MPND	MPN domain containing	Other	other
-1,238	4,37E-02	8,333	MPZL1	MPZL1	myelin protein zero like 1	Plasma Membrane	other
-1,225	2,58E-02	8,403	C5orf45	MRNIP	MRN complex interacting protein	Nucleus	other
-1,305	2,03E-02	13,426	MRPL21	MRPL21	mitochondrial ribosomal protein L21	Cytoplasm	other
1,209	4,96E-02	8,426	MRPL27	MRPL27	mitochondrial ribosomal protein L27	Cytoplasm	other
1,248	3,27E-02	8,880	MRPL48	MRPL48	mitochondrial ribosomal protein L48	Cytoplasm	other
-1,208	4,38E-02	11,384	MRPS26	MRPS26	mitochondrial ribosomal protein S26	Cytoplasm	other
-1,223	3,35E-02	9,837	MRRF	MRRF	mitochondrial ribosome recycling factor	Cytoplasm	other
1,219	4,60E-02	8,454	MS4A13	MS4A13	membrane spanning 4-domains A13	Other	other
-1,220	4,47E-02	8,434	MSL1	MSL1	MSL complex subunit 1	Nucleus	other
-1,272	2,32E-02	8,649	MTAP	MTAP	methylthioadenosine phosphorylase	Nucleus	enzyme
1,348	1,52E-02	14,362	MTCH1	MTCH1	mitochondrial carrier 1	Cytoplasm	other
-1,248	1,54E-02	9,382	MTF2	MTF2	metal response element binding transcription factor 2	Nucleus	transcription regulator
-1,271	2,18E-02	9,739	MTFR1L	MTFR1L	mitochondrial fission regulator 1 like	Other	other
1,242	4,03E-02	8,435	MTOR	MTOR	mechanistic target of rapamycin kinase	Nucleus	kinase
1,373	3,22E-03	8,604	MTUS2	MTUS2	microtubule associated scaffold protein 2	Nucleus	other
-1,246	2,78E-02	7,982	MUC15	MUC15	mucin 15, cell surface associated	Extracellular Space	other
-1,202	4,03E-02	8,328	MYBL1	MYBL1	MYB proto-oncogene like 1	Nucleus	transcription regulator
-1,247	1,78E-02	8,699	MYH10	MYH10	myosin heavy chain 10	Cytoplasm	enzyme
-1,287	3,89E-02	8,042	MYH15	MYH15	myosin heavy chain 15	Extracellular Space	other
-1,222	4,10E-02	8,210	MYL10	MYL10	myosin light chain 10	Cytoplasm	other
-1,205	3,49E-02	9,623	MYNN	MYNN	myoneurin	Nucleus	transcription regulator
1,253	2,36E-02	8,813	MYO18A	MYO18A	myosin XVIIIA	Cytoplasm	other
1,397	2,19E-02	11,521	MYO1D	MYO1D	myosin ID	Cytoplasm	enzyme
1,207	4,41E-02	8,822	NAA50	NAA50	N-alpha-acetyltransferase 50, NatE catalytic subunit	Cytoplasm	enzyme
-1,250	1,88E-02	8,147	NAGA	NAGA	alpha-N-acetylgalactosaminidase	Cytoplasm	enzyme
1,414	2,00E-02	13,946	NAGK	NAGK	N-acetylglucosamine kinase	Cytoplasm	kinase
1,209	4,92E-02	8,063	NARS2	NARS2	asparaginyl-tRNA synthetase 2, mitochondrial	Cytoplasm	enzyme
-1,219	3,24E-02	8,587	NAT9	NAT9	N-acetyltransferase 9 (putative)	Other	other
-1,230	3,84E-02	8,178	NBEA	NBEA	neurobeachin	Cytoplasm	other
-1,458	1,02E-02	9,928	NCAPD2	NCAPD2	non-SMC condensin I complex subunit D2	Nucleus	other
-1,336	2,71E-02	9,892	NDUFAF3	NDUFAF3	NADH:ubiquinone oxidoreductase complex assembly factor 3	Nucleus	other
-1,270	2,33E-02	8,868	C8orf38	NDUFAF6	NADH:ubiquinone oxidoreductase complex assembly factor 6	Cytoplasm	other
-1,204	3,21E-02	8,450	PVRL2	NECTIN2	nectin cell adhesion molecule 2	Plasma Membrane	transmembrane receptor
1,295	9,84E-03	9,909	NEDD4L	NEDD4L	NEDD4 like E3 ubiquitin protein ligase	Cytoplasm	enzyme
1,408	4,30E-02	12,086	NEFH	NEFH	neurofilament heavy	Cytoplasm	other
-1,259	1,70E-02	8,560	NEIL1	NEIL1	nei like DNA glycosylase 1	Nucleus	enzyme
-1,220	4,66E-02	12,081	NEK6	NEK6	NIMA related kinase 6	Nucleus	kinase
-1,345	1,73E-02	9,278	NEU3	NEU3	neuraminidase 3	Plasma Membrane	enzyme
1,307	1,33E-02	8,812	NFAT5	NFAT5	nuclear factor of activated T cells 5	Nucleus	transcription regulator
-1,269	3,06E-02	10,310	NFX1	NFX1	nuclear transcription factor, X-box binding 1	Nucleus	transcription regulator
1,212	4,30E-02	8,378	NGEF	NGEF	neuronal guanine nucleotide exchange factor	Cytoplasm	other
-1,337	1,27E-02	8,362	NGFR	NGFR	nerve growth factor receptor	Plasma Membrane	transmembrane receptor
1,272	4,65E-02	12,177	NGLY1	NGLY1	N-glycanase 1	Cytoplasm	enzyme
-1,206	3,51E-02	8,507	FAM129B	NIBAN2	niban apoptosis regulator 2	Cytoplasm	transcription regulator
-1,302	1,85E-02	9,730	FAM129C	NIBAN3	niban apoptosis regulator 3	Other	other
-1,266	3,06E-02	8,457	NIPSNAP1	NIPSNAP1	nipsnap homolog 1	Cytoplasm	enzyme
-1,256	3,72E-02	8,605	NIPSNAP2	NIPSNAP2	nipsnap homolog 2	Plasma Membrane	other
1,225	4,84E-02	7,958	NLRP6	NLRP6	NLR family pyrin domain containing 6	Plasma Membrane	G-protein coupled receptor
-1,286	1,89E-02	8,241	NNT	NNT	nicotinamide nucleotide transhydrogenase	Cytoplasm	enzyme
-1,260	2,69E-02	13,563	NPEPPS	NPEPPS	aminopeptidase puromycin sensitive	Cytoplasm	peptidase
-1,282	2,42E-02	8,459	NPRL2	NPRL2	NPR2 like, GATOR1 complex subunit	Cytoplasm	kinase
-1,222	4,54E-02	8,000	NPTX1	NPTX1	neuronal pentraxin 1	Extracellular Space	other
-1,243	3,07E-02	9,571	NR1H3	NR1H3	nuclear receptor subfamily 1 group H member 3	Nucleus	ligand-dependent nuclear receptor
1,231	3,20E-02	8,487	NR6A1	NR6A1	nuclear receptor subfamily 6 group A member 1	Nucleus	ligand-dependent nuclear receptor
1,262	4,17E-02	12,665	NRD1	NRDC	nardilysin convertase	Cytoplasm	peptidase
-1,256	3,86E-02	7,930	NRN1L	NRN1L	neuritin 1 like	Nucleus	other
1,256	3,34E-02	8,470	NSFL1C	NSFL1C	NSFL1 cofactor	Cytoplasm	other
1,278	4,08E-02	9,473	NSMCE4A	NSMCE4A	NSE4 homolog A, SMC5-SMC6 complex component	Nucleus	other
1,254	2,72E-02	8,133	NT5C	NT5C	5', 3'-nucleotidase, cytosolic	Cytoplasm	phosphatase
-1,271	2,94E-02	8,411	NTN5	NTN5	netrin 5	Other	other
1,299	1,08E-02	8,634	NUB1	NUB1	negative regulator of ubiquitin like proteins 1	Nucleus	other
-1,258	4,85E-02	10,217	NUDT22	NUDT22	nudix hydrolase 22	Nucleus	enzyme
-1,325	2,55E-02	9,441	NUDT7	NUDT7	nudix hydrolase 7	Cytoplasm	enzyme
-1,263	4,67E-02	8,054	NUMB	NUMB	NUMB endocytic adaptor protein	Plasma Membrane	other
-1,221	3,52E-02	8,489	NXNL2	NXNL2	nucleoredoxin like 2	Other	transporter
-1,299	1,05E-02	8,448	NXT1	NXT1	nuclear transport factor 2 like export factor 1	Nucleus	transporter
1,252	3,20E-02	8,986	OASL	OASL	2'-5'-oligoadenylate synthetase like	Cytoplasm	enzyme
-1,208	4,19E-02	8,467	OLFML2A	OLFML2A	olfactomedin like 2A	Extracellular Space	other
1,247	2,95E-02	8,977	OMA1	OMA1	OMA1 zinc metallopeptidase	Cytoplasm	peptidase
-1,329	1,34E-02	9,289	OSBPL6	OSBPL6	oxysterol binding protein like 6	Cytoplasm	other
-1,244	1,85E-02	8,487	OTOA	OTOA	otoancorin	Extracellular Space	other
-1,230	2,59E-02	10,285	OTUD7B	OTUD7B	OTU deubiquitinase 7B	Cytoplasm	peptidase
-1,208	3,67E-02	8,200	P2RX1	P2RX1	purinergic receptor P2X 1	Plasma Membrane	ion channel
-1,403	1,47E-02	14,379	PABPC1	PABPC1	poly(A) binding protein cytoplasmic 1	Cytoplasm	translation regulator
1,346	4,61E-02	13,431	PANK2	PANK2	pantothenate kinase 2	Cytoplasm	kinase
-1,297	2,88E-02	11,395	PAPOLA	PAPOLA	poly(A) polymerase alpha	Nucleus	enzyme
1,219	3,39E-02	10,357	PAQR7	PAQR7	progestin and adipoQ receptor family member 7	Plasma Membrane	other
-1,278	1,01E-02	8,280	PAQR8	PAQR8	progestin and adipoQ receptor family member 8	Plasma Membrane	other
-1,230	2,80E-02	8,118	PARD3B	PARD3B	par-3 family cell polarity regulator beta	Plasma Membrane	other
-1,350	9,15E-03	12,545	PARP16	PARP16	poly(ADP-ribose) polymerase family member 16	Cytoplasm	enzyme
1,215	3,55E-02	8,692	PATL1	PATL1	PAT1 homolog 1, processing body mRNA decay factor	Cytoplasm	translation regulator
1,366	4,34E-02	8,787	PATZ1	PATZ1	POZ/BTB and AT hook containing zinc finger 1	Nucleus	transcription regulator
-1,293	7,29E-03	7,994	PAX6	PAX6	paired box 6	Nucleus	transcription regulator
-1,370	5,44E-03	10,207	PBXIP1	PBXIP1	PBX homeobox interacting protein 1	Nucleus	transcription regulator
1,300	2,86E-02	8,294	PCDH18	PCDH18	protocadherin 18	Extracellular Space	other
-1,336	1,06E-02	9,418	PCM1	PCM1	pericentriolar material 1	Cytoplasm	other
1,415	3,24E-02	11,664	PCP4L1	PCP4L1	Purkinje cell protein 4 like 1	Other	other
1,389	2,88E-02	11,809	PDCL3	PDCL3	phosducin like 3	Cytoplasm	other
1,214	4,35E-02	8,140	PEX26	PEX26	peroxisomal biogenesis factor 26	Cytoplasm	other
-1,313	6,17E-03	8,825	PEX5	PEX5	peroxisomal biogenesis factor 5	Cytoplasm	other
1,204	4,52E-02	8,147	PGAM2	PGAM2	phosphoglycerate mutase 2	Cytoplasm	phosphatase
-1,405	2,69E-02	10,486	PHB	PHB	prohibitin	Nucleus	transcription regulator
1,227	3,70E-02	8,018	PHF20	PHF20	PHD finger protein 20	Nucleus	transcription regulator
-1,232	3,64E-02	8,959	PHF20L1	PHF20L1	PHD finger protein 20 like 1	Other	other
-1,237	2,38E-02	8,875	PHYHIPL	PHYHIPL	phytanoyl-CoA 2-hydroxylase interacting protein like	Cytoplasm	other
-1,214	3,53E-02	7,922	PIGH	PIGH	phosphatidylinositol glycan anchor biosynthesis class H	Cytoplasm	enzyme
-1,241	3,54E-02	8,979	PIK3C2A	PIK3C2A	phosphatidylinositol-4-phosphate 3-kinase catalytic subunit type 2 alpha	Cytoplasm	kinase
-1,239	2,09E-02	7,995	PITPNM1	PITPNM1	phosphatidylinositol transfer protein membrane associated 1	Cytoplasm	transporter
1,279	2,12E-02	8,561	DFNB59	PJVK	pejvakin	Cytoplasm	other
1,209	3,88E-02	8,007	PKM	PKM	pyruvate kinase M1/2	Cytoplasm	kinase
-1,474	3,49E-02	8,943	PLA2G3	PLA2G3	phospholipase A2 group III	Extracellular Space	enzyme
1,293	3,63E-02	8,605	PLA2G6	PLA2G6	phospholipase A2 group VI	Cytoplasm	enzyme
-1,210	4,83E-02	8,265	PLAC8	PLAC8	placenta associated 8	Nucleus	other
-1,382	1,02E-02	10,857	PLCD1	PLCD1	phospholipase C delta 1	Cytoplasm	enzyme
-1,293	4,00E-02	8,203	PLCG1	PLCG1	phospholipase C gamma 1	Cytoplasm	enzyme
-1,254	1,93E-02	8,031	PLD5	PLD5	phospholipase D family member 5	Other	other
1,418	4,95E-02	14,277	PLEKHO2	PLEKHO2	pleckstrin homology domain containing O2	Cytoplasm	other
-1,285	1,06E-02	7,640	PLLP	PLLP	plasmolipin	Plasma Membrane	transporter
-1,202	4,56E-02	7,919	PLPPR3	PLPPR3	phospholipid phosphatase related 3	Other	phosphatase
-1,223	3,37E-02	7,651	SILV	PMEL	premelanosome protein	Plasma Membrane	enzyme
1,669	1,54E-03	13,219	PMS2	PMS2	PMS1 homolog 2, mismatch repair system component	Nucleus	enzyme
-1,234	2,89E-02	8,577	PNISR	PNISR	PNN interacting serine and arginine rich protein	Nucleus	other
-2,072	4,77E-02	7,208	POLD1	POLD1	DNA polymerase delta 1, catalytic subunit	Nucleus	enzyme
-1,287	1,05E-02	8,917	POLD2	POLD2	DNA polymerase delta 2, accessory subunit	Nucleus	enzyme
-1,291	3,21E-02	11,964	POLR2I	POLR2I	RNA polymerase II subunit I	Nucleus	transcription regulator
1,242	2,38E-02	8,189	POLR3G	POLR3G	RNA polymerase III subunit G	Nucleus	enzyme
-1,338	4,86E-03	7,920	POP4	POP4	POP4 homolog, ribonuclease P/MRP subunit	Nucleus	enzyme
1,297	6,65E-03	8,151	POPDC2	POPDC2	popeye domain containing 2	Plasma Membrane	other
1,227	2,64E-02	7,971	POPDC3	POPDC3	popeye domain containing 3	Other	other
-1,246	4,90E-02	8,218	PPA1	PPA1	inorganic pyrophosphatase 1	Cytoplasm	enzyme
-1,205	4,08E-02	9,061	PPIE	PPIE	peptidylprolyl isomerase E	Nucleus	enzyme
1,237	2,11E-02	9,087	PPM1F	PPM1F	protein phosphatase, Mg2+/Mn2+ dependent 1F	Cytoplasm	phosphatase
1,233	1,83E-02	8,169	PPME1	PPME1	protein phosphatase methylesterase 1	Nucleus	enzyme
1,332	2,21E-02	11,207	PPP1R12A	PPP1R12A	protein phosphatase 1 regulatory subunit 12A	Cytoplasm	phosphatase
1,351	2,95E-02	8,697	PPP3R1	PPP3R1	protein phosphatase 3 regulatory subunit B, alpha	Cytoplasm	phosphatase
-1,360	4,43E-02	15,340	PRDX2	PRDX2	peroxiredoxin 2	Cytoplasm	enzyme
-1,301	3,41E-02	9,121	PRDX3	PRDX3	peroxiredoxin 3	Cytoplasm	enzyme
-1,468	3,94E-02	9,247	PREB	PREB	prolactin regulatory element binding	Nucleus	transcription regulator
-1,214	2,77E-02	8,665	PRKDC	PRKDC	protein kinase, DNA-activated, catalytic subunit	Nucleus	kinase
1,548	6,94E-03	14,763	PRMT3	PRMT3	protein arginine methyltransferase 3	Nucleus	enzyme
-1,240	3,73E-02	8,142	PRODH2	PRODH2	proline dehydrogenase 2	Cytoplasm	enzyme
-1,313	3,21E-02	11,082	PRPS1	PRPS1	phosphoribosyl pyrophosphate synthetase 1	Cytoplasm	kinase
-1,214	4,15E-02	8,130	PRPSAP1	PRPSAP1	phosphoribosyl pyrophosphate synthetase associated protein 1	Extracellular Space	other
1,456	1,77E-02	12,859	PRPSAP2	PRPSAP2	phosphoribosyl pyrophosphate synthetase associated protein 2	Other	other
-1,244	4,07E-02	8,405	PSD3	PSD3	pleckstrin and Sec7 domain containing 3	Cytoplasm	other
1,323	1,12E-02	8,102	PSMA1	PSMA1	proteasome 20S subunit alpha 1	Cytoplasm	peptidase
-1,259	3,28E-02	14,622	PSMB6	PSMB6	proteasome 20S subunit beta 6	Nucleus	peptidase
1,310	3,79E-02	14,027	PSMB7	PSMB7	proteasome 20S subunit beta 7	Cytoplasm	peptidase
-1,303	2,53E-02	9,924	PSMC3	PSMC3	proteasome 26S subunit, ATPase 3	Nucleus	enzyme
-1,282	1,59E-02	13,248	PSME1	PSME1	proteasome activator subunit 1	Cytoplasm	other
-1,547	1,29E-02	10,633	PTPRD	PTPRD	protein tyrosine phosphatase receptor type D	Plasma Membrane	phosphatase
-1,262	1,76E-02	9,375	PTTG1IP	PTTG1IP	PTTG1 interacting protein	Nucleus	other
1,396	4,86E-02	8,013	PYGO2	PYGO2	pygopus family PHD finger 2	Nucleus	other
-1,310	1,14E-02	8,123	PYY	PYY	peptide YY	Extracellular Space	other
-1,342	1,51E-02	10,376	QRSL1	QRSL1	glutaminyl-tRNA amidotransferase subunit QRSL1	Cytoplasm	enzyme
-1,216	3,85E-02	12,544	QSOX1	QSOX1	quiescin sulfhydryl oxidase 1	Cytoplasm	enzyme
-1,380	1,47E-02	14,030	RAB11A	RAB11A	RAB11A, member RAS oncogene family	Cytoplasm	enzyme
1,221	3,80E-02	8,929	RAB3IL1	RAB3IL1	RAB3A interacting protein like 1	Cytoplasm	other
1,306	7,69E-03	9,593	RAB6A	RAB6A	RAB6A, member RAS oncogene family	Cytoplasm	enzyme
-1,291	1,39E-02	12,313	RABAC1	RABAC1	Rab acceptor 1	Cytoplasm	other
1,272	1,24E-02	7,951	RALGAPA2	RALGAPA2	Ral GTPase activating protein catalytic subunit alpha 2	Cytoplasm	other
-1,284	1,92E-02	13,589	RBKS	RBKS	ribokinase	Cytoplasm	kinase
-1,283	2,14E-02	9,467	RBM27	RBM27	RNA binding motif protein 27	Nucleus	other
-1,284	3,42E-02	9,064	RBM39	RBM39	RNA binding motif protein 39	Nucleus	transcription regulator
-1,269	2,55E-02	8,374	RBM7	RBM7	RNA binding motif protein 7	Nucleus	other
-1,236	2,83E-02	7,994	RCSD1	RCSD1	RCSD domain containing 1	Other	other
-1,215	3,86E-02	8,360	REST	REST	RE1 silencing transcription factor	Nucleus	transcription regulator
-1,217	2,62E-02	8,254	RETNLB	RETNLB	resistin like beta	Extracellular Space	other
-1,343	3,24E-02	12,250	RGS5	RGS5	regulator of G protein signaling 5	Plasma Membrane	enzyme
1,238	2,17E-02	8,255	C1orf186	RHEX	regulator of hemoglobinization and erythroid cell expansion	Plasma Membrane	other
-1,232	4,05E-02	8,373	RHNO1	RHNO1	RAD9-HUS1-RAD1 interacting nuclear orphan 1	Nucleus	other
-1,288	2,19E-02	10,364	RHOF	RHOF	ras homolog family member F, filopodia associated	Cytoplasm	enzyme
-1,332	2,78E-02	8,323	RHOT1	RHOT1	ras homolog family member T1	Cytoplasm	enzyme
-1,259	3,01E-02	8,046	RIN2	RIN2	Ras and Rab interactor 2	Cytoplasm	other
-1,206	3,53E-02	8,413	RIT1	RIT1	Ras like without CAAX 1	Plasma Membrane	enzyme
1,269	2,23E-02	8,603	FAM82A1	RMDN2	regulator of microtubule dynamics 2	Cytoplasm	other
1,348	3,43E-02	8,665	RNF10	RNF10	ring finger protein 10	Cytoplasm	enzyme
-1,319	2,13E-02	13,656	RNF130	RNF130	ring finger protein 130	Cytoplasm	peptidase
-1,309	1,99E-02	9,406	RNF14	RNF14	ring finger protein 14	Cytoplasm	transcription regulator
-1,279	1,18E-02	8,377	RNF144A	RNF144A	ring finger protein 144A	Nucleus	enzyme
-1,386	5,62E-03	7,937	RNF145	RNF145	ring finger protein 145	Other	other
1,264	3,07E-02	8,057	RNF146	RNF146	ring finger protein 146	Cytoplasm	enzyme
-1,319	4,37E-02	13,787	RNF181	RNF181	ring finger protein 181	Cytoplasm	enzyme
1,228	3,28E-02	8,497	RNF185	RNF185	ring finger protein 185	Cytoplasm	enzyme
1,319	4,47E-02	14,901	RNF215	RNF215	ring finger protein 215	Other	other
-1,283	4,37E-02	9,181	RNF7	RNF7	ring finger protein 7	Nucleus	enzyme
-1,329	4,62E-02	14,351	TROVE2	RO60	Ro60, Y RNA binding protein	Nucleus	other
1,282	1,34E-02	9,026	ROCK1	ROCK1	Rho associated coiled-coil containing protein kinase 1	Cytoplasm	kinase
-1,244	3,56E-02	8,701	RP1L1	RP1L1	RP1 like 1	Cytoplasm	other
1,278	3,52E-02	10,200	RPL13A	RPL13A	ribosomal protein L13a	Cytoplasm	other
-1,271	4,39E-02	15,145	RPS5	RPS5	ribosomal protein S5	Cytoplasm	other
-1,304	2,62E-02	8,230	RPTOR	RPTOR	regulatory associated protein of MTOR complex 1	Cytoplasm	other
-1,276	1,26E-02	8,287	RPUSD3	RPUSD3	RNA pseudouridine synthase D3	Other	other
-1,333	1,62E-02	9,264	RRAGB	RRAGB	Ras related GTP binding B	Cytoplasm	enzyme
-1,223	3,91E-02	12,206	RRAS2	RRAS2	RAS related 2	Plasma Membrane	enzyme
-1,309	3,61E-02	7,817	RRH	RRH	retinal pigment epithelium-derived rhodopsin homolog	Plasma Membrane	G-protein coupled receptor
1,361	3,66E-02	9,755	RSAD1	RSAD1	radical S-adenosyl methionine domain containing 1	Cytoplasm	other
1,224	2,32E-02	8,340	RSPH3	RSPH3	radial spoke head 3	Extracellular Space	other
-1,264	1,84E-02	8,273	RTL1	RTL1	retrotransposon Gag like 1	Other	other
-1,389	2,97E-02	7,462	RTN1	RTN1	reticulon 1	Cytoplasm	other
1,577	4,35E-02	11,905	RTP1	RTP1	receptor transporter protein 1	Plasma Membrane	other
-1,258	1,31E-02	10,874	RUNX1	RUNX1	RUNX family transcription factor 1	Nucleus	transcription regulator
-1,241	4,62E-02	10,311	RUSC1	RUSC1	RUN and SH3 domain containing 1	Cytoplasm	other
-1,257	3,07E-02	13,192	RYK	RYK	receptor like tyrosine kinase	Plasma Membrane	kinase
1,297	1,76E-02	8,054	RYR3	RYR3	ryanodine receptor 3	Plasma Membrane	ion channel
1,414	5,12E-03	7,762	S100A8	S100A8	S100 calcium binding protein A8	Cytoplasm	other
-1,294	4,96E-02	8,510	SAFB2	SAFB2	scaffold attachment factor B2	Cytoplasm	other
1,250	4,44E-02	7,887	SAMD3	SAMD3	sterile alpha motif domain containing 3	Other	other
-1,274	1,76E-02	8,040	SAMD4A	SAMD4A	sterile alpha motif domain containing 4A	Cytoplasm	translation regulator
-1,264	2,93E-02	13,551	SARNP	SARNP	SAP domain containing ribonucleoprotein	Nucleus	transcription regulator
-1,322	5,18E-03	7,950	SCAF8	SCAF8	SR-related CTD associated factor 8	Nucleus	other
-1,325	2,28E-02	10,221	SCAMP3	SCAMP3	secretory carrier membrane protein 3	Cytoplasm	transporter
-1,369	3,95E-02	13,828	SCARB2	SCARB2	scavenger receptor class B member 2	Plasma Membrane	transmembrane receptor
1,232	3,94E-02	8,036	SCARNA3	SCARNA3	small Cajal body-specific RNA 3	Other	other
-1,201	3,90E-02	7,951	SCNN1D	SCNN1D	sodium channel epithelial 1 subunit delta	Plasma Membrane	ion channel
-1,291	1,69E-02	8,985	SCP2	SCP2	sterol carrier protein 2	Cytoplasm	transporter
-1,295	1,74E-02	11,445	SEC61A2	SEC61A2	SEC61 translocon subunit alpha 2	Cytoplasm	transporter
-1,449	1,73E-02	8,699	SECISBP2	SECISBP2	SECIS binding protein 2	Cytoplasm	translation regulator
1,338	3,49E-02	9,861	SELENBP1	SELENBP1	selenium binding protein 1	Cytoplasm	other
-1,259	1,68E-02	8,097	SEMA4D	SEMA4D	semaphorin 4D	Plasma Membrane	transmembrane receptor
1,235	4,45E-02	8,727	SEMA4G	SEMA4G	semaphorin 4G	Plasma Membrane	other
1,286	4,72E-02	8,934	SERAC1	SERAC1	serine active site containing 1	Extracellular Space	other
-1,248	4,86E-02	7,980	SERPINA11	SERPINA11	serpin family A member 11	Extracellular Space	other
-1,269	1,79E-02	11,629	SETDB1	SETDB1	SET domain bifurcated histone lysine methyltransferase 1	Nucleus	enzyme
1,248	4,29E-02	8,373	SFSWAP	SFSWAP	splicing factor SWAP	Nucleus	other
1,289	7,41E-03	8,179	SGOL1	SGO1	shugoshin 1	Nucleus	other
1,465	2,29E-02	12,778	SH3KBP1	SH3KBP1	SH3 domain containing kinase binding protein 1	Cytoplasm	other
1,321	7,74E-03	7,659	SHB	SHB	SH2 domain containing adaptor protein B	Cytoplasm	other
1,276	3,01E-02	8,358	SIRPB2	SIRPB2	signal regulatory protein beta 2	Other	other
-1,203	3,89E-02	8,165	SLC12A8	SLC12A8	solute carrier family 12 member 8	Other	transporter
1,367	1,93E-02	14,710	SLC14A1	SLC14A1	solute carrier family 14 member 1 (Kidd blood group)	Plasma Membrane	transporter
1,234	3,88E-02	8,514	SLC16A10	SLC16A10	solute carrier family 16 member 10	Plasma Membrane	transporter
-1,237	3,39E-02	8,204	SLC16A13	SLC16A13	solute carrier family 16 member 13	Cytoplasm	other
-1,260	1,52E-02	8,732	SLC24A1	SLC24A1	solute carrier family 24 member 1	Plasma Membrane	transporter
1,267	3,54E-02	8,935	SLC25A14	SLC25A14	solute carrier family 25 member 14	Cytoplasm	transporter
1,307	1,25E-02	9,126	SLC25A15	SLC25A15	solute carrier family 25 member 15	Cytoplasm	transporter
-1,464	3,55E-02	10,924	SLC25A33	SLC25A33	solute carrier family 25 member 33	Cytoplasm	transporter
-1,210	2,97E-02	8,217	SLC26A6	SLC26A6	solute carrier family 26 member 6	Cytoplasm	transporter
-1,281	3,79E-02	9,693	SLC2A1	SLC2A1	solute carrier family 2 member 1	Plasma Membrane	transporter
1,219	4,16E-02	7,695	SLC35F3	SLC35F3	solute carrier family 35 member F3	Other	other
1,300	7,78E-03	8,538	SLC35F5	SLC35F5	solute carrier family 35 member F5	Other	other
-1,233	3,67E-02	8,043	SLC36A3	SLC36A3	solute carrier family 36 member 3	Other	transporter
-1,202	3,58E-02	8,614	SLC39A4	SLC39A4	solute carrier family 39 member 4	Plasma Membrane	transporter
1,350	3,37E-02	14,072	SLC39A5	SLC39A5	solute carrier family 39 member 5	Plasma Membrane	transporter
-1,289	1,67E-02	8,694	SLC39A6	SLC39A6	solute carrier family 39 member 6	Plasma Membrane	transporter
-1,306	2,45E-02	13,622	SLC44A1	SLC44A1	solute carrier family 44 member 1	Plasma Membrane	transporter
1,259	4,82E-02	8,418	SLC44A3	SLC44A3	solute carrier family 44 member 3	Plasma Membrane	transporter
-1,241	2,05E-02	8,153	SLC46A3	SLC46A3	solute carrier family 46 member 3	Extracellular Space	transporter
-1,315	2,38E-02	10,928	PQLC1	SLC66A2	solute carrier family 66 member 2	Other	other
1,304	1,17E-02	8,014	SLC9B1	SLC9B1	solute carrier family 9 member B1	Plasma Membrane	transporter
-1,287	4,81E-02	8,953	SMAD4	SMAD4	SMAD family member 4	Nucleus	transcription regulator
-1,237	4,05E-02	8,542	SMAD6	SMAD6	SMAD family member 6	Nucleus	transcription regulator
1,329	6,23E-03	8,533	SMC2	SMC2	structural maintenance of chromosomes 2	Nucleus	transporter
-1,219	4,02E-02	9,088	SMC4	SMC4	structural maintenance of chromosomes 4	Nucleus	transporter
1,204	4,34E-02	7,898	SMC5	SMC5	structural maintenance of chromosomes 5	Nucleus	other
-1,209	4,86E-02	8,531	SMG7	SMG7	SMG7 nonsense mediated mRNA decay factor	Nucleus	other
1,266	3,83E-02	9,877	C8orf40	SMIM19	small integral membrane protein 19	Nucleus	other
-1,293	3,90E-02	8,867	SMYD3	SMYD3	SET and MYND domain containing 3	Nucleus	enzyme
-1,403	5,92E-03	7,600	SNAI2	SNAI2	snail family transcriptional repressor 2	Nucleus	transcription regulator
1,209	3,23E-02	8,043	SNAP91	SNAP91	synaptosome associated protein 91	Plasma Membrane	other
-1,326	2,18E-02	8,350	SNCAIP	SNCAIP	synuclein alpha interacting protein	Cytoplasm	transcription regulator
1,330	1,51E-02	8,264	SNORA15	SNORA15	small nucleolar RNA, H/ACA box 15	Other	other
1,424	3,45E-02	13,806	SNORA18	SNORA18	small nucleolar RNA, H/ACA box 18	Other	other
1,404	1,56E-02	7,719	SNORA19	SNORA19	small nucleolar RNA, H/ACA box 19	Other	other
1,207	4,62E-02	8,466	SNORA20	SNORA20	small nucleolar RNA, H/ACA box 20	Other	other
1,288	1,11E-02	8,186	SNORA21	SNORA21	small nucleolar RNA, H/ACA box 21	Other	other
1,500	4,84E-03	11,625	SNORA29	SNORA29	small nucleolar RNA, H/ACA box 29	Other	other
1,240	2,23E-02	8,463	SNORA70	SNORA70	small nucleolar RNA, H/ACA box 70	Other	other
1,322	4,70E-03	8,139	SNORA72	SNORA72	small nucleolar RNA, H/ACA box 72	Other	other
-1,284	2,66E-02	8,062	SNORD70	SNORD70	small nucleolar RNA, C/D box 70	Other	other
1,306	9,72E-03	8,887	SNRNP200	SNRNP200	small nuclear ribonucleoprotein U5 subunit 200	Nucleus	enzyme
-1,208	3,91E-02	8,467	SNRNP48	SNRNP48	small nuclear ribonucleoprotein U11/U12 subunit 48	Nucleus	other
-1,286	1,54E-02	13,733	SNX10	SNX10	sorting nexin 10	Cytoplasm	transporter
-1,211	3,72E-02	8,885	SNX13	SNX13	sorting nexin 13	Cytoplasm	transporter
1,273	2,15E-02	8,200	SNX15	SNX15	sorting nexin 15	Cytoplasm	transporter
1,255	2,03E-02	8,944	SNX5	SNX5	sorting nexin 5	Cytoplasm	transporter
-1,310	3,44E-02	8,066	SNX6	SNX6	sorting nexin 6	Cytoplasm	transporter
1,229	2,22E-02	8,079	SOBP	SOBP	sine oculis binding protein homolog	Nucleus	other
-1,256	1,72E-02	8,145	SORD	SORD	sorbitol dehydrogenase	Cytoplasm	enzyme
-1,330	1,95E-02	9,128	SP1	SP1	Sp1 transcription factor	Nucleus	transcription regulator
1,208	3,85E-02	8,246	SP4	SP4	Sp4 transcription factor	Nucleus	transcription regulator
1,234	1,86E-02	8,627	SPATS2L	SPATS2L	spermatogenesis associated serine rich 2 like	Nucleus	other
-1,260	3,77E-02	8,348	SPOCK2	SPOCK2	SPARC (osteonectin), cwcv and kazal like domains proteoglycan 2	Extracellular Space	other
-1,254	2,57E-02	8,425	SPOPL	SPOPL	speckle type BTB/POZ protein like	Other	other
1,441	2,63E-02	9,103	SPPL2A	SPPL2A	signal peptide peptidase like 2A	Plasma Membrane	peptidase
1,267	4,09E-02	8,505	SPRYD4	SPRYD4	SPRY domain containing 4	Cytoplasm	other
-1,242	4,35E-02	7,797	SRF	SRF	serum response factor	Nucleus	transcription regulator
-1,213	3,08E-02	10,033	SRPX	SRPX	sushi repeat containing protein X-linked	Cytoplasm	other
-1,329	1,61E-02	7,890	SRRM1	SRRM1	serine and arginine repetitive matrix 1	Nucleus	other
1,307	1,00E-02	8,267	SFRS7	SRSF7	serine and arginine rich splicing factor 7	Nucleus	other
-1,229	3,07E-02	8,445	STAG2	STAG2	stromal antigen 2	Nucleus	other
-1,242	3,08E-02	8,455	STARD7	STARD7	StAR related lipid transfer domain containing 7	Cytoplasm	other
-1,284	1,01E-02	8,605	STAT1	STAT1	signal transducer and activator of transcription 1	Nucleus	transcription regulator
-1,323	4,45E-03	8,799	STAT6	STAT6	signal transducer and activator of transcription 6	Nucleus	transcription regulator
-1,345	3,76E-03	13,519	STK25	STK25	serine/threonine kinase 25	Cytoplasm	kinase
-1,247	1,62E-02	8,066	STOML1	STOML1	stomatin like 1	Other	other
-1,234	2,18E-02	13,619	SUCLG1	SUCLG1	succinate-CoA ligase GDP/ADP-forming subunit alpha	Cytoplasm	enzyme
1,215	4,69E-02	8,176	SFRS14	SUGP2	SURP and G-patch domain containing 2	Nucleus	other
-1,276	2,14E-02	7,904	SUMF2	SUMF2	sulfatase modifying factor 2	Cytoplasm	other
-1,207	4,33E-02	8,003	KIAA0247	SUSD6	sushi domain containing 6	Other	other
1,232	3,73E-02	8,803	C9orf119	SWI5	SWI5 homologous recombination repair protein	Nucleus	other
-1,339	8,39E-03	7,716	SYDE1	SYDE1	synapse defective Rho GTPase homolog 1	Cytoplasm	other
-1,219	4,72E-02	8,322	C14orf49	SYNE3	spectrin repeat containing nuclear envelope family member 3	Nucleus	other
-1,276	3,70E-02	14,441	SYPL1	SYPL1	synaptophysin like 1	Plasma Membrane	transporter
-1,282	3,91E-02	7,921	SYT17	SYT17	synaptotagmin 17	Plasma Membrane	other
1,223	2,27E-02	8,323	TAC3	TAC3	tachykinin precursor 3	Extracellular Space	other
-1,274	4,87E-02	15,404	TACC1	TACC1	transforming acidic coiled-coil containing protein 1	Nucleus	other
1,206	3,24E-02	8,239	TANK	TANK	TRAF family member associated NFKB activator	Cytoplasm	other
-1,214	2,66E-02	8,585	TARBP2	TARBP2	TARBP2 subunit of RISC loading complex	Nucleus	other
1,313	1,25E-02	8,141	TBC1D1	TBC1D1	TBC1 domain family member 1	Nucleus	other
1,446	3,46E-02	13,186	TBC1D20	TBC1D20	TBC1 domain family member 20	Nucleus	other
-1,241	2,56E-02	8,314	TBC1D22A	TBC1D22A	TBC1 domain family member 22A	Other	other
-1,232	4,74E-02	8,283	TBC1D8B	TBC1D8B	TBC1 domain family member 8B	Cytoplasm	other
-1,234	3,38E-02	8,377	TBCK	TBCK	TBC1 domain containing kinase	Cytoplasm	kinase
-1,353	3,12E-02	8,151	TEP1	TEP1	telomerase associated protein 1	Nucleus	enzyme
-1,250	3,50E-02	8,092	TESC	TESC	tescalcin	Cytoplasm	other
1,223	3,10E-02	8,030	TET2	TET2	tet methylcytosine dioxygenase 2	Nucleus	enzyme
1,231	3,40E-02	10,843	TFAP2C	TFAP2C	transcription factor AP-2 gamma	Nucleus	transcription regulator
-1,223	3,78E-02	8,781	TFB1M	TFB1M	transcription factor B1, mitochondrial	Cytoplasm	transcription regulator
-1,276	2,04E-02	8,456	TGFB1	TGFB1	transforming growth factor beta 1	Extracellular Space	growth factor
-1,244	2,59E-02	8,294	TGS1	TGS1	trimethylguanosine synthase 1	Nucleus	enzyme
-1,237	3,42E-02	9,611	TIAM1	TIAM1	TIAM Rac1 associated GEF 1	Cytoplasm	other
1,504	2,00E-02	9,428	TLR6	TLR6	toll like receptor 6	Plasma Membrane	transmembrane receptor
-1,582	1,41E-03	9,633	TM7SF2	TM7SF2	transmembrane 7 superfamily member 2	Cytoplasm	enzyme
-1,250	1,93E-02	7,540	TMC7	TMC7	transmembrane channel like 7	Other	other
-1,288	3,37E-02	11,712	TMCO3	TMCO3	transmembrane and coiled-coil domains 3	Other	transporter
1,424	3,82E-02	13,034	TMED9	TMED9	transmembrane p24 trafficking protein 9	Cytoplasm	transporter
1,314	2,37E-02	8,138	TMEM18	TMEM18	transmembrane protein 18	Nucleus	other
-1,296	6,89E-03	8,765	TMEM185A	TMEM185A	transmembrane protein 185A	Nucleus	other
-1,212	4,94E-02	8,109	FAM70A	TMEM255A	transmembrane protein 255A	Extracellular Space	other
1,320	2,15E-02	8,636	TMEM33	TMEM33	transmembrane protein 33	Cytoplasm	other
1,274	8,95E-03	8,555	TMEM41A	TMEM41A	transmembrane protein 41A	Other	other
1,248	4,20E-02	12,221	TMEM43	TMEM43	transmembrane protein 43	Nucleus	other
1,281	1,42E-02	9,210	TMEM65	TMEM65	transmembrane protein 65	Cytoplasm	other
-1,273	4,28E-02	8,202	TMPRSS2	TMPRSS2	transmembrane serine protease 2	Plasma Membrane	peptidase
1,276	2,83E-02	7,740	TMTC3	TMTC3	transmembrane O-mannosyltransferase targeting cadherins 3	Cytoplasm	enzyme
-1,220	3,82E-02	8,924	TMX2	TMX2	thioredoxin related transmembrane protein 2	Other	enzyme
1,212	4,62E-02	7,943	TNFAIP1	TNFAIP1	TNF alpha induced protein 1	Plasma Membrane	ion channel
-1,244	1,83E-02	7,778	TOP3B	TOP3B	DNA topoisomerase III beta	Nucleus	enzyme
-1,275	1,29E-02	8,921	TOR1A	TOR1A	torsin family 1 member A	Cytoplasm	enzyme
1,267	2,10E-02	8,607	TOR1AIP1	TOR1AIP1	torsin 1A interacting protein 1	Nucleus	other
1,324	1,30E-02	8,572	C20orf100	TOX2	TOX high mobility group box family member 2	Nucleus	transcription regulator
1,251	3,71E-02	7,668	TPR	TPR	translocated promoter region, nuclear basket protein	Nucleus	other
-1,593	1,56E-02	10,720	TPX2	TPX2	TPX2 microtubule nucleation factor	Nucleus	other
-1,204	3,77E-02	8,418	TRAPPC1	TRAPPC1	trafficking protein particle complex subunit 1	Cytoplasm	other
-1,253	2,63E-02	8,442	TRAPPC13	TRAPPC13	trafficking protein particle complex subunit 13	Cytoplasm	other
1,302	3,82E-02	8,736	TRIM31	TRIM31	tripartite motif containing 31	Cytoplasm	enzyme
1,217	4,99E-02	7,624	TRPV4	TRPV4	transient receptor potential cation channel subfamily V member 4	Plasma Membrane	ion channel
1,285	3,94E-02	8,345	TRRAP	TRRAP	transformation/transcription domain associated protein	Nucleus	transcription regulator
1,228	3,17E-02	8,446	TSC22D2	TSC22D2	TSC22 domain family member 2	Nucleus	transcription regulator
1,221	4,28E-02	8,120	TSHZ1	TSHZ1	teashirt zinc finger homeobox 1	Nucleus	transcription regulator
-1,245	3,43E-02	8,518	TSPYL2	TSPYL2	TSPY like 2	Nucleus	other
1,339	7,94E-03	9,229	KIAA0406	TTI1	TELO2 interacting protein 1	Cytoplasm	other
1,465	2,51E-02	12,845	TTLL12	TTLL12	tubulin tyrosine ligase like 12	Cytoplasm	other
-1,403	1,28E-03	7,996	TUBB1	TUBB1	tubulin beta 1 class VI	Cytoplasm	other
1,220	4,00E-02	8,308	TUFT1	TUFT1	tuftelin 1	Cytoplasm	other
-1,249	2,50E-02	8,749	TULP3	TULP3	TUB like protein 3	Extracellular Space	other
-1,345	8,46E-03	8,619	TUSC2	TUSC2	tumor suppressor 2, mitochondrial calcium regulator	Nucleus	other
1,262	2,46E-02	8,448	TUSC3	TUSC3	tumor suppressor candidate 3	Plasma Membrane	transporter
-1,319	2,35E-02	12,860	TXNDC5	TXNDC5	thioredoxin domain containing 5	Cytoplasm	enzyme
1,294	1,57E-02	8,494	TXNDC8	TXNDC8	thioredoxin domain containing 8	Cytoplasm	transporter
-1,379	4,28E-02	9,325	UBE2C	UBE2C	ubiquitin conjugating enzyme E2 C	Cytoplasm	enzyme
1,206	3,32E-02	8,393	UBE2N	UBE2N	ubiquitin conjugating enzyme E2 N	Cytoplasm	enzyme
1,222	2,80E-02	8,356	UBE4B	UBE4B	ubiquitination factor E4B	Cytoplasm	enzyme
-1,209	4,87E-02	8,068	UBXN4	UBXN4	UBX domain protein 4	Extracellular Space	other
1,232	3,06E-02	10,592	UFC1	UFC1	ubiquitin-fold modifier conjugating enzyme 1	Cytoplasm	enzyme
1,242	3,17E-02	11,541	UFD1L	UFD1	ubiquitin recognition factor in ER associated degradation 1	Cytoplasm	peptidase
-1,240	2,21E-02	7,865	UGT8	UGT8	UDP glycosyltransferase 8	Cytoplasm	enzyme
-1,421	1,78E-02	9,138	UHRF1BP1L	UHRF1BP1L	UHRF1 binding protein 1 like	Cytoplasm	other
1,231	3,27E-02	8,339	ULK2	ULK2	unc-51 like autophagy activating kinase 2	Cytoplasm	kinase
1,298	2,04E-02	11,173	UNC119B	UNC119B	unc-119 lipid binding chaperone B	Cytoplasm	other
1,346	1,45E-02	9,081	UNG	UNG	uracil DNA glycosylase	Nucleus	enzyme
-1,238	4,66E-02	10,311	UQCR10	UQCR10	ubiquinol-cytochrome c reductase, complex III subunit X	Cytoplasm	enzyme
1,426	3,55E-02	14,342	URM1	URM1	ubiquitin related modifier 1	Cytoplasm	other
-1,245	2,55E-02	8,366	UROS	UROS	uroporphyrinogen III synthase	Cytoplasm	enzyme
1,452	1,76E-02	8,061	USP2	USP2	ubiquitin specific peptidase 2	Cytoplasm	peptidase
-1,285	1,15E-02	8,554	USP21	USP21	ubiquitin specific peptidase 21	Cytoplasm	peptidase
1,248	4,33E-02	8,750	UTP20	UTP20	UTP20 small subunit processome component	Nucleus	other
1,281	2,44E-02	13,046	VEGFC	VEGFC	vascular endothelial growth factor C	Extracellular Space	growth factor
1,342	3,93E-02	13,820	VPS26B	VPS26B	VPS26, retromer complex component B	Cytoplasm	transporter
-1,239	4,29E-02	8,691	VPS72	VPS72	vacuolar protein sorting 72 homolog	Nucleus	transcription regulator
-1,227	3,57E-02	10,824	VWA5A	VWA5A	von Willebrand factor A domain containing 5A	Nucleus	other
-1,274	1,85E-02	8,390	VWA5B1	VWA5B1	von Willebrand factor A domain containing 5B1	Extracellular Space	other
-1,268	2,90E-02	10,167	WARS	WARS1	tryptophanyl-tRNA synthetase 1	Cytoplasm	enzyme
-1,282	3,79E-02	8,684	WDR38	WDR38	WD repeat domain 38	Other	other
-1,295	3,05E-02	8,104	WDR43	WDR43	WD repeat domain 43	Nucleus	transcription regulator
-1,260	2,33E-02	8,741	WDR45	WDR45	WD repeat domain 45	Cytoplasm	other
-1,218	4,71E-02	9,284	WDR61	WDR61	WD repeat domain 61	Nucleus	other
-1,288	1,63E-02	9,365	WDR75	WDR75	WD repeat domain 75	Nucleus	other
1,269	2,17E-02	9,051	WDR82	WDR82	WD repeat domain 82	Nucleus	other
1,471	2,70E-02	12,678	WFDC3	WFDC3	WAP four-disulfide core domain 3	Extracellular Space	other
-1,265	1,63E-02	8,945	WNK1	WNK1	WNK lysine deficient protein kinase 1	Cytoplasm	kinase
-1,674	1,43E-02	11,226	WNT5B	WNT5B	Wnt family member 5B	Extracellular Space	other
1,214	4,44E-02	8,042	WRN	WRN	WRN RecQ like helicase	Nucleus	enzyme
-1,252	1,92E-02	8,238	WT1	WT1	WT1 transcription factor	Nucleus	transcription regulator
1,471	4,75E-02	12,955	WTIP	WTIP	WT1 interacting protein	Nucleus	transcription regulator
-1,211	4,80E-02	8,030	XKR5	XKR5	XK related 5	Other	other
1,368	3,98E-02	12,634	ZDHHC16	ZDHHC16	zinc finger DHHC-type palmitoyltransferase 16	Cytoplasm	enzyme
1,216	2,83E-02	7,997	ZEB1	ZEB1	zinc finger E-box binding homeobox 1	Nucleus	transcription regulator
-1,251	3,12E-02	8,436	ZEB2	ZEB2	zinc finger E-box binding homeobox 2	Nucleus	transcription regulator
1,431	4,84E-02	8,807	ZFP36L1	ZFP36L1	ZFP36 ring finger protein like 1	Nucleus	transcription regulator
1,365	4,02E-02	13,480	ZFR	ZFR	zinc finger RNA binding protein	Nucleus	other
-1,211	3,57E-02	8,197	ZMYND8	ZMYND8	zinc finger MYND-type containing 8	Nucleus	transcription regulator
-1,388	5,42E-03	8,035	ZNF18	ZNF18	zinc finger protein 18	Nucleus	transcription regulator
-1,456	2,60E-03	10,826	ZNF3	ZNF3	zinc finger protein 3	Nucleus	transcription regulator
-1,263	3,96E-02	8,129	ZNF341	ZNF341	zinc finger protein 341	Nucleus	transcription regulator
-1,210	4,25E-02	8,295	ZNF384	ZNF384	zinc finger protein 384	Nucleus	transcription regulator
-1,344	2,29E-02	9,249	ZNF394	ZNF394	zinc finger protein 394	Nucleus	transcription regulator
-1,222	3,59E-02	8,945	ZNF395	ZNF395	zinc finger protein 395	Cytoplasm	transcription regulator
-1,321	7,57E-03	8,434	ZNF541	ZNF541	zinc finger protein 541	Nucleus	transcription regulator
-1,210	3,40E-02	8,321	ZNF576	ZNF576	zinc finger protein 576	Nucleus	transcription regulator
-1,331	4,77E-03	8,490	ZNF644	ZNF644	zinc finger protein 644	Nucleus	transcription regulator
1,234	3,11E-02	8,775	ZPBP2	ZPBP2	zona pellucida binding protein 2	Extracellular Space	other
1,235	3,39E-02	8,825	ZRANB2	ZRANB2	zinc finger RANBP2-type containing 2	Nucleus	other
1,244	2,73E-02	8,220	ZSCAN12	ZSCAN12	zinc finger and SCAN domain containing 12	Nucleus	transcription regulator
1,278	3,16E-02	7,971	ZSWIM7	ZSWIM7	zinc finger SWIM-type containing 7	Other	other
1,454	9,41E-03	13,036	ZSWIM8	ZSWIM8	zinc finger SWIM-type containing 8	Extracellular Space	other
-1,292	3,64E-02	11,450	ZW10	ZW10	zw10 kinetochore protein	Nucleus	other
